# Supplementary material for: Two contrasting classes of nucleolus-associated domains in mouse fibroblast heterochromatin
Source: HighWire-hosted journal article supplement (doi:10.1101/gr.247072.118), 2019-06-14
Supplement: Supplemental_Methods.docx [file Supplemental_Methods.docx]

**Vertii *et al*.: Supplementary Materials and Methods**

*Cell culture and treatments*. Mouse embryonic fibroblasts (MEFs) derived from C57/Bl6 mice were immortalized using a standard 3T3 procedure (Todaro and Green 1963) at the UMASS Transgenic Mouse Modeling Core. Cells were obtained at p48. Cells were cultured in Dulbecco`s modified Eagle medium, DMEM (Life Technologies, cat#11995-065), 10% bovine fetal serum, and 100 U/ml penicillin/ streptavidin. For passaging, old medium was aspirated, and cells were washed with 5 ml PBS per 10 cm plate. 1 ml of 0.05% (w/v) trypsin-EDTA was added and the plate was incubated at 37°C until the cells detached. 5 ml 37°C medium was added per 10 cm plate to quench the trypsin and the cells were transferred to a 15-ml conical tube and pelleted by centrifugation for 5 min at 200g at 4°C. Media was aspirated and cells were resuspended in 5 ml of fresh pre-warmed (37°C) medium. Cells were passaged at dilutions ranging from 1:2 to 1:10.

MEF cells were cloned by serial dilution. Cells diluted into single cell per well in 96-well plates, and wells containing healthy single clones were further expanded. Of these, Clone 5 cells were used in all experiments except uncrosslinked nucleolus isolation experiment #18 (see Supplemental Table S1), which used the uncloned population.

For EZH2 inhibitor experiments, MEF cells were either treated with 0.1% DMSO or with the following inhibitors for 72 hours.

| Inhibitor | Cat. No. | Stock | Final conc |
| --- | --- | --- | --- |
| GSK126 | ApexBio #A3446 | 10 mM in DMSO | 10 μM |
| EPZ6438 | ApexBio #A8221 | 10 mM in DMSO | 100 nM |

1,6-Hexanediol (Sigma-Aldrich, #240117-50G) was dissolved directly into culture media (10% stock). MEFs were treated with a final concentration of 1% or 0.5% 1,6-Hexanediol for 2 hrs.

Mouse embryonic stem cell (mES) line D3 was a kind gift from David Gilbert’s lab. The cells were grown in 2i mES medium on plates without gelatin coating, so that the cells grew in suspension. Below are components used for 2i mES medium:

**Serum free ES medium (SFES) - 1000 ml**

| Solution (stock) | Cat. No. | Final conc. | Volume |
| --- | --- | --- | --- |
| NEUROBASAL MEDIA | Gibco 21103-049 | 50% | 500ml |
| DMEM/F12 | Gibco 11320-033 | 50% | 500ml |
| N2-SUPPLEMENT | Gibco 17502-048 | 0.5x | 5ml |
| B27(+RA) | Gibco 17504-044 | 0.5x | 10ml |
| 7.5% BSA | Gibco 15260-037 | 0.05% | 6.66ml |

**Complete “2i” medium - 100 ml**

| Solution (stock) | Cat. No. | Final conc. | Volume |
| --- | --- | --- | --- |
| SFES | N/A | 1x | 100ml |
| PD03259010 (10mM) | Reprocell 04-0006-02C | 1 μM | 10 μl |
| CHIR99021 (10mM) | Reprocell 04-0004-02C | 3 μM | 30 μl |
| GLUTAMINE (200mM) | Gibco 25030-081 | 2mM | 1ml |
| Monothioglycerol (11.9M) | Sigma M6145-25ML | 1.5x10-4M | 1.26 μl |
| LIF (1x10^6 U/ml)* | Cell Guidance Systems GFM200 | 1,000U/ml | 100 μl* |

Medium was kept out of the light at 4 ̊C, for no more than 2 weeks.

Cells were passaged by removing “2i” media and applying 0.5 ml of accutase (EMD Millipore SF006) per 3 cm plate for a few minutes at RT to separate cell colonies and to obtain a single-cell suspension. After incubation with accutase, 5 mL of SFES was added. The suspension was transferred into 15 ml tube and centrifuged at 1,000 rpm for 5 min at RT. The cell pellet was resuspended in complete “2i” media and plated into new vessel at a dilution of 1:6-1:10.

*Cell viability.* Cell viability was assessed by the Trypan Blue (Sigma, T-8154) dye exclusion method. MEF cells were trypsinized, washed with PBS and centrifuged as during passaging. Trypan blue was diluted 1:5 (v/v in PBS) and used to resuspend cell pellets. Viable (trypan excluding) and dead (trypan stained) cells were counted using a hemocytometer. N > 100 cells for each condition in each of three replicate experiments.

*Quantitative PCR*. DNA extraction from input whole cells and purified nucleoli was performed using Quick-DNA Universal Kit (Zymo Research, CA). DNA concentration was measured by Qubit dsDNA HS Assay kit (Invitrogen, Eugene, OR). 5 ng of DNA from each sample was analyzed using the Kapa SYBR Fast Q-PCR Kit (Kapa Biosystems, Wilmington, MA). The following primers were used: Set1 Fw: gag gtt gaa ggt ggt ttc ca; Rv: gag cag tcg ggt gct ctt ac; Set 2 Fw: gaa ctt tga agg ccg aag tg; Rv: atc tga acc cga ctc cct tt. The following program was used: 98°C 30s, 95°C 10s, 60°C 30s, 40 cycles. All the signals were normalized to that of genomic DNA as indicated in the figure legends, and the 2−ΔΔ*CT* method was used for quantification (Life Technologies).

*Antibodies.*The following antibodies were used: fibrillarin (ab5821, Abcam, Cambridge, MA), B23 (nucleophosmin) (sc-32256, Santa Cruz, Dallas, TX), Nup62 (ab50008, Abcam Cambridge, MA), Lamin A/C (2032, Cell Signaling technology, Danvers, MA USA), Lamin A (ab25300, Abcam), Nucleophosmin (ab10530, Abcam), Histone H3 (di methyl K9) (ab1220, Abcam), Histone H3 K9me3 (ab8889, Abcam), H3 K27me3 (39155, Active Motif), Histone H3 (ab18521, Abcam), actin (sc-8432, Santa Cruz, Dallas, TX). Secondary antibodies for immunofluorescence were conjugated with: Alexa 488, Cy3 (Jackson ImmunoResearch, West Grove, PA). For western blots, horseradish peroxidase (HRP) anti-mouse and anti-rabbit secondary antibodies (Jackson ImmunoResearch, West Grove, PA) were used.

*Immunoblotting*. Protein concentrations from total cell lysates or isolated nucleoli were assessed by Bradford assay (BioRad reagent Blue R-250, cat. #161-0436 with BSA as a standard). 10 μg of each sample were loaded per lane on 12% SDS-PAGE gels, transferred to PVDF membrane for 2hrs, 80v, 4°C. Membrane was blocked in PBS-nonfat milk and incubated with corresponding antibodies in accordance to manufacture instructions.

*Small RNA isolation*. Small RNAs were isolated using Qiagen miRNAeasy kits. In brief, we prepared RNA from 500 μl from each fraction that was collected during non-crosslinked nucleoli preparations. 700 μl QIazol reagent was added, and the mixture was vortexed and incubated at RT for 5 min. After incubation, 140 μl of chloroform was added, vortexed, incubated for 2 min at RT and clarified by centrifugation for 15 min at 12,000g at 4° C. The aqueous clear phase was transferred in to new tube and 1.5x volume of 100% ethanol was added, mixed by pipetting, and loaded onto the RNAeasy column. Non-bound material was removed by centrifugation, and the column was washed with RPE buffer and eluted in 50 μl of RNAse-free water. 3 μl of RNAse inhibitor (Promega, N2511) was added to each sample. 1 μg of RNA from total, cytosolic, nuclear, nucleoplasmic and nucleolar fractions analyzed on a 10% denaturing 7 M urea acrylamide gel and stained with SYBR Green (Sigma-Aldrich, #S9305, 1:10,000 dilution).

*DNA isolation, deep sequencing, and read preprocessing and mapping*. Total genomic and nucleolar DNA was isolated with Quick-DNA Universal Kit (Zymo Research, CA, USA). Libraries were constructed using Illumina`s TruSeq DNA PCR-free Library Preparation kit (350 bp) and fragments were size-selected by sample-purifying beads. 150bp paired-end sequencing was performed using Illumina HiSeq X Ten sequencing system using the HiSeq X Reagent Kit V2. 206.6 and 186.6 million reads for first replicate were obtained from genomic and nucleolar samples, respectively. >96% and >94%, respectively, of these were mappable. For subsequent samples, the subsampling analysis suggested that 50 million reads were sufficient (Supplemental Figure 3). For more details on sequencing, please see the files associated with the data at [data.4dnucleome.org](https://urldefense.proofpoint.com/v2/url?u=http-3A__data.4dnucleome.org&d=DwMGaQ&c=WJBj9sUF1mbpVIAf3biu3CPHX4MeRjY_w4DerPlOmhQ&r=JqQ8_Clm34xp32rT3DzotqsofamUUUyNmo3M4_tlIEI&m=wpq3_ne97QsentW0ogSlRa900xo6qgci1eLLMuXR1hg&s=dzSBedDvcPX2aKihSEt82VYm4oeVWsUUMNkvkMqFqlw&e=).

Sequencing reads were trimmed with cutadapt (version 1.16) (Martin 2011) before being aligned to the mouse genome (mm10) using Bowtie 2 v2.1.0 with the standard default settings (Langmead and Salzberg 2012). Alignments with mapping quality score greater than 20 were kept (samtools v1.3), and duplicated reads were removed using Picard tools v1.96 (hNps://broadinsUtute.github.io/picard/). To visualize the mapped reads, the bigWig files were generated using deepTools2 (Ramírez et al. 2016).

*Overlap analysis.*The extent of the overlap between each pair of peak sets (A and B) was measured by the Jaccard similarity index (JSI)  (Favorov et al. 2012). The higher the JSI, the higher the extent of the overlap. JSI is defined as A∩B∣/∣A∪B∣⁠, where |A∩B| indicates the number of nucleotide base-pairs shared in both peak sets A and B, and ∣A∪B| indicates the number of nucleotide base-pairs in peak set A or B. Cluster hierarchy was built using the agglomerative hierarchical clustering algorithm with computed JSIs to depict the similarity among selected peak sets.

*NAD boundary analysis*. We analyzed the regions that are ±50,000 bp around every NAD start (nonNAD to NAD) and end (NAD to nonNAD) position. We first generated BigWig files using the bamCoverage function in deepTools 2.2.2 (Ramírez et al. 2016), with binSize and smoothLength set to 100 and 300 respectively, and the number of reads were normalized to 1X coverage with chrX excluded from sampling the regions for normalization. We then overlapped these BigWig files with NAD borders to generate intensity profiles, using the ScoreMatrixList function in the Genomation R package (Akalin et al. 2015).  We divided the entire border interval (±50,000 bp) into 200 bins, and calculated the average signal intensities within each bin. For the border from NAD to nonNAD, we reversed the order of the average signal intensities, and combined the signal intensities for the border from nonNAD to NAD, and plotted the combined signals against the binned regions using the ggplot2 R package (Wickham 2009).

*NAD-splitting region (NSR) analysis.* We sought to analyze the regions between NADs discovered with *NADfinder,* and which are contained within larger NADs identified by other programs. We termed these “NAD-splitting regions (NSRs)”. To identify the NSRs, we first found the common NADs identified by two of the following three tools: *normr, hiddenDomains and EDD*. We then obtained all pairs of NADs, identified by *NADfinder*, that are contained in or equal to any of the common NADs. The regions between the paired NADs are defined as NSRs, and the distribution of their widths was depicted as a boxplot in log10 scale for each combination of two tools used (Supplemental Fig S3F).

We noted that more than 90% peaks, generated by *hiddenDomains* or *normr*, contain 1bp gaps between them, which leads to very few or zero NSR when *hiddenDomains* or *normr* is used as one of the tools for the identification of common NADs. We believe that this is an artifact of *hiddenDomains* and *normr*, and merged peaks within 1bp away from each other using the reduce function in the *GenomicRanges* (Lawrence et al. 2013) R package prior to the identification of NSRs. We also noted that peaks generated by *MACS* contain small gaps between them, which leads to zero NSR when *MACS* is used as one of the tools for the identification of common NADs. Because of the small widths of the gaps and NADs identified by *MACS*, we decided it was of limited utility for the analysis of megabase-scale domains such as NADs (e.g. Fig. 1C-D) and NSRs (Fig. 4E).

Next, we identified genes that overlap with the NSRs using *ChIPpeakAnno* (Zhu 2013; Zhu et al. 2010), and obtained their expression levels using the RNA-seq dataset GSM1621026 (Delbarre et al. 2017). The distribution of the gene expression levels is depicted as a boxplot in log10(FPKM + 1) scale for the NSRs, alongside the FPKM values of other types of genomic regions, including Type I/II NADs, non-NADs and the whole genome (Supplemental Figure S3F). We observed that NSRs,identified by *NADfinder*, contain genes with similar expression levels as those present in the non-NAD subset of the genome. Thus, within large regions that other tools aggregated into contiguous NADs, *NADfinder* is able to identify functionally distinct NAD and non-NAD sub-regions that correlate with gene expression.

*DNA-FISH probes.* The bacterial artificial chromosomes (BACs) were obtained from the BACPAC Resource Center of Children’s Hospital Oakland Research Institute (Oakland, CA). DNA was isolated using BAC mini DNA prep Kit (Zymo Research, CA). BAC probes were and labeled using the Bioprime Labeling Kit (Invitrogen, Eugene, OR, USA).

| **Laboratory BAC Probe Nomenclature** | **Systematic BACPAC name** | **Coordinates (GRCm38 (mm10))** |  |
| --- | --- | --- | --- |
| pPK824 | RP23-259J6 | Chr19: 8064943-8232607 | |
| pPK825 | RP23-444J20 | Chr17: 34211624-34393919 | |
| pPK827 | RP23-50O18 | Chr12: 114981697-115224299 | |
| pPK828 | RP23-103F12 | Chr12: 112224643-112423224 | |
| pPK831 | RP23-340I4 | ChrX: 116237263-116428250 | |
| pPK832 | RP23-129I12 | Chr2: 129216980-129424990 | |
| pPK834 | RP23-355A8 | Chr16: 44816053-45031327 | |
| pPK871 | RP23-322M3 | Chr12: 110758289-111006192 | |
| pPK914 | RP24-212E13 | Chr16: 95,182,165-95,358,805 | |
| pPK915 | RP23-3G4 | Chr17: 12,456,384-12,690,495 | |

*3-D DNA FISH/ immunocytochemistry and microscopy.*

Immunofluorescence microscopy analysis of DNA-FISH/immunocytochemistry-labeled cells was carried out as previously described

(Smith et al. 2014; Matheson and Kaufman 2017). Briefly, cells were grown on sterile coverslips until ~70% confluent. For mES cells, serum was added to 2i medium (10% final) prior to seeding them on 0.1% gelatin-coated coverslips (10 hours). Cells were rinsed in PBS, placedin a coplin jar just long enough to rinse with 10 ml of CSK buffer (CSK Stock: 50 ml 0.1 M Pipes- NaOH pH 7.8; 50 ml 1M NaCl; 1.5 ml 1M MgCl2; 51.35 g sucrose. Total volume was brought to 500 ml with H2O, filter sterilized and stored at 4°C). Next, cover slips were transferred into a second coplin jar containing Triton-CSK buffer for 5 min (9 ml CSK buffer + 0.5 ml 10% Triton X-100 solution (Roche) + 0.5 ml 200 mM VRC (vanadyl ribonucleoside complex; NEB). After 5 min on ice, the samples were transferred into a third jar containing 10 ml of 4% Paraformaldehyde in 1X PBS for 10 min at RT. Samples were rinsed with RT 70% EtOH 3x, and transferred into a coplin jar containing 70% EtOH for 10 min at RT.

After 10 min of incubation in 70% EtOH, the coverslips were incubated in RNA removal solution (10 ml 70% EtOH + 200 μl 10M NaOH) for 5 min at RT. Coverslips were then washed 3 times with 70% EtOH, and then incubated for 5 min in 70% EtOH and in 100% EtOH for another 5 min. The coverslips were then briefly air dried prior to denaturation at 800C for 2.5 min in a buffer containing 7 ml Formamide, 2 ml H2O, 1 ml 20 x SSC; pH adjusted between 7.1 and 7.4 with HCl, pre-heated in coplin jar to 800C. After denaturation, coverslips were incubated for 5 min in ice-cold 70% EtOH and then for 5 min in ice-cold 100% EtOH.

DNA hybridization mixtures contained: 3 μl Cot-1 DNA (1 μg/μl), 2 μl salmon sperm (Invitrogen, D9156) and added tRNA (10 mg/ml), and 1-5 μl of Bioprime labelled FISH DNA Probe (100 ng/coverslip). These mixtures were assembled in 1.5 ml eppendorf tubes on ice and placed into a Speed-Vac for 20 minutes – 1 hour until the liquid completely dried. The DNA was resuspended with 10 μl formamide (Sigma-Aldrich 221198), vortexed and spun at 16,000 x g for 1 min. The samples were heated to 80°C for 10 min and 10 μl of hybridization buffer was added to the tube. This hybridization cocktail was transferred to parafilm on a glass support. The coverslips were briefly air dried, inverted onto the hybridization cocktail and covered with parafilm. Coverslips were then incubated O/N at 370C in a humidified chamber. After incubation, samples were washed first with 5 ml formamide + 5 ml 4X SSC for 20 min at 37°C in a humid chamber; then with 2X SSC for 20 min in 37° C humid chamber; and with 1X SSC, at RT in a shaker for 20 min. Coverslips were incubated with 4X SSC at RT for 1 min. Fluorescently-labeled Streptavidin (594 or 488) was diluted 1:500 in 4X SSC / 1% BSA and coverslips were incubated with this at 37°C for 1 hour. The incubation was followed by three washes perfomed in the dark: 4X SSC at RT in a shaker for 10 min; 4X SSC / 0.1% Triton X-100 at RT in a shaker for 10 min; and with 4X SSC at RT in a shaker for 10 min.

Coverslips were then incubated in PBS for 5 min. For immunocytochemistry, samples were blocked in 1X PBS/ 1% BSA for 15-30 min at RT. Primary antibodies were diluted in blocking solution and samples were incubated O/N at 40C. Samples were washed with PBS and incubated with secondary antibodies for 1 h at 37 0C. Coverslips were washed with PBS, 1X PBS / 0.1% Triton X-100, and 1X PBS at RT on a shaker, 10 min each. Finally, the coverslips were rinsed twice with PBS and one time with water, and mounted using Prolong Gold antifade reagent (Invitrogen, cat#P36934).

Images were acquired with a Zeiss Axiovert 200M, a Perkin Elmer Ultraview spinning disc microscope and Hamamatsu ORCA-ER camera. (100x NA1.4 Plan-Apocromat Oil objective). DNA-FISH probes were counted through Z-stacks manually, and were scored as “associated” when no detectable gap between the nucleolar marker and the labeled probe was detected throughout the Z-stack. Each probe was analyzed in at least three biological replicates, with about 100 alleles counted per each replicate. For images, fluorescence range intensity was adjusted identically for each series of panels. *Z* stacks are shown as 2D maximum projections or as a single optical section (MetaMorph, Molecular Devices). All statistical analysis was done using GraphPad Prism software.

For the analysis of H3K27me3 and the effects of EZH2 inhibitors, fluorescence intensities were quantified from the sum of Z-stacks using an adaptation of previously described methods (Delaval et al. 2011). Intensities in concentric circles of 408 μm2 (inner area) and 816 μm2 (outer area) were measured. Inner area circles were placed around nuclei so that the borders of the nucleus did not go beyond the area. Nuclear signal intensity was calculated using formula: I=E5-((E6-E5)*(C5/(C6-C5)), where I is nuclear intensity; E5 is an integrated signal intensity of inner circle; E6 is an integrated signal intensity of outer circle; C5 is the area of inner circle, C6 is the area of outer circle. In this manner, local background was calculated as the signal in the outer area minus the signal in the inner area, and the signal in each nucleus was the inner signal minus the local background.

**Supplemental Methods References**

Akalin A, Franke V, Vlahoviček K, Mason CE, Schübeler D. 2015. Genomation: a toolkit to summarize, annotate and visualize genomic intervals. *Bioinformatics* **31**: 1127–1129.

Delaval B, Bright A, Lawson ND, Doxsey S. 2011. The cilia protein IFT88 is required for spindle orientation in mitosis. *Nature Cell Biology* **13**: 461–468.

Delbarre E, Ivanauskiene K, Spirkoski J, Shah A, Vekterud K, Moskaug JØ, Bøe SO, Wong LH, Küntziger T, Collas P. 2017. PML protein organizes heterochromatin domains where it regulates histone H3.3 deposition by ATRX/DAXX. *Genome Research* **27**: 913–921.

Favorov A, Mularoni L, Cope LM, Medvedeva Y, Mironov AA, Makeev VJ, Wheelan SJ. 2012. Exploring massive, genome scale datasets with the GenometriCorr package. *PLoS Comput Biol* **8**: e1002529.

Langmead B, Salzberg SL. 2012. Fast gapped-read alignment with Bowtie 2. *Nature Methods* **9**: 357–359.

Lawrence M, Huber W, Pagès H, Aboyoun P, Carlson M, Gentleman R, Morgan MT, Carey VJ. 2013. Software for computing and annotating genomic ranges. ed. A. Prlic. *PLoS Comput Biol* **9**: e1003118.

Martin M. 2011. Cutadapt removes adapter sequences from high-throughput sequencing reads. *EMBnet J* **17**: 10–12.

Matheson TD, Kaufman PD. 2017. The p150N domain of chromatin assembly factor-1 regulates Ki-67 accumulation on the mitotic perichromosomal layer. *Mol Biol Cell* **28**: 21–29.

Ramírez F, Ryan DP, Grüning B, Bhardwaj V, Kilpert F, Richter AS, Heyne S, Dündar F, Manke T. 2016. deepTools2: a next generation web server for deep-sequencing data analysis. *Nucleic Acids Res* **44**: W160–5.

Smith CL, Matheson TD, Trombly DJ, Sun X, Campeau E, Han X, Yates JR3, Kaufman PD. 2014. A separable domain of the p150 subunit of human chromatin assembly factor-1 promotes protein and chromosome associations with nucleoli. *Mol Biol Cell* **25**: 2866–2881.

Todaro GJ, Green H. 1963. Quantitative studies of the growth of mouse embryo cells in culture and their development into established lines. *J Cell Biol* **17**: 299–313.

Wickham H. 2009. *ggplot2*. Springer New York, New York, NY.

Zhu LJ. 2013. Integrative analysis of ChIP-chip and ChIP-seq dataset. *Methods Mol Biol* **1067**: 105–124.

Zhu LJ, Gazin C, Lawson ND, Pages H, Lin SM, Lapointe DS, Green MR. 2010. ChIPpeakAnno: a Bioconductor package to annotate ChIP-seq and ChIP-chip data. *BMC Bioinformatics* **11**: 237.
