# Supplementary material for: Two contrasting classes of nucleolus-associated domains in mouse fibroblast heterochromatin
Source: HighWire-hosted journal article supplement (doi:10.1101/gr.247072.118), 2019-06-14
Supplement: Supplemental_Table_S1.xlsx [file Supplemental_Table_S1.xlsx]

## Sheet: Sheet1
4DN Data Portal File Title		# experiments	# sequence files	Sample Type	4DN Biosample	Kaufman Lab experiment #	Crosslinked?
4DNES15QV1OO		1	2	Nucleolus	4DNBSUFUMET4	18	nonXL
4DNES8D85R8H		1	2	Genomic Control	4DNBSUFUMET4	18	nonXL
4DNESR3K7VRN		3	6	Nucleolus	4DNBSR38DB47	24	XL
				Nucleolus	4DNBSBPETWT4	26	XL
				Nucleolus	4DNBS3QFU2XK	28	XL
4DNES4U7AY3P		3	6	Genomic Control	4DNBSR38DB47	24	XL
				Genomic Control	4DNBSBPETWT4	26	XL
				Genomic Control	4DNBS3QFU2XK	28	XL
4DNESNEBF9W4		2	4	Nucleolus	4DNBSIGXW4YJ	29	nonXL
				Nucleolus	4DNBSMH4Q7FS	33	nonXL
4DNES7SVJXAI		2	4	Genomic Control	4DNBSIGXW4YJ	29	nonXL
				Genomic Control	4DNBSMH4Q7FS	33	nonXL
Supplemental Table S1
Sequencing data file nomenclature. Files are available at data.4dnucleome.org
XL indicates the sample was crosslinked, nonXL indicates it was not.
