# Supplementary material for: Two contrasting classes of nucleolus-associated domains in mouse fibroblast heterochromatin
Source: HighWire-hosted journal article supplement (doi:10.1101/gr.247072.118), 2019-06-14
Supplement: Supplemental_Table_S5.xlsx [file Supplemental_Table_S5.xlsx]

## Sheet: XL MEF NADs liftover to hg38 
chr8	54996033	55610579
chr8	68760957	69573713
chr8	72353232	72806996
chr6	50153153	51221466
chr6	51531801	52026408
chr6	72556151	73081814
chr6	67191815	69554178
chr6	64011022	66965574
chr6	62484855	63120257
chr6	60744251	62079654
chr2	98069615	98380342
chr2	98662314	99105066
chr2	99966943	100812483
chr2	102932671	104853379
chr2	105928087	105963006
chr2	195787272	196122744
chr2	193075912	195464725
chr2	192267424	193000825
chr2	191091323	191509591
chr2	190445584	190788395
chr2	196284614	197264894
chr2	197737462	199278299
chr2	199749030	200724516
chr2	204162144	205848700
chr2	206218713	206884974
chr2	208544697	209313778
chr2	209618104	209919647
chr2	210291010	212571828
chr2	213268827	214570118
chr2	214822301	215104984
chr2	216579758	217711844
chr2	219747257	222026642
chr2	222982954	223789302
chr2	223975863	224377024
chr2	224646868	225947537
chr2	226976210	227300341
chr2	227745796	229713651
chr2	232038991	232269295
chr2	233747210	233936682
chr2	234587173	234805637
chr2	235208135	235418319
chr5	99104035	102299270
chr18	64040727	67182274
chr2	120409303	121084416
chr2	118219054	119106892
chr2	117256217	117723083
chr2	114806642	117057298
chr2	114077871	114495797
chr2	132588169	133164517
chr2	133807417	134079266
chr2	134515675	134708611
chr2	136438885	137850173
chr1	204634061	204941939
chr1	203934878	204046858
chr1	199007861	200086755
chr1	181303884	181933216
chr1	176963140	177903059
chr1	175480955	175693230
chr1	168833398	168866160
chr1	166179361	166678744
chr1	165501226	165536738
chr1	162128311	162178575
chr1	221029524	221305162
chr1	220362356	220553724
chr1	210709244	210728622
chr1	208525615	208858346
chr6	150346403	150802122
chr6	151695422	151984824
chr6	152481993	152814276
chr6	153287486	153978051
chr6	147683302	148046942
chr6	146990054	147054810
chr6	145336816	145604879
chr6	141700472	141987434
chr6	138117387	138459490
chr6	136727232	137604612
chr6	135642844	136082869
chr6	133613505	134120209
chr6	132559018	132725433
chr6	126263302	127109520
chr6	122968764	123605894
chr6	114043457	115800037
chr6	112343177	113068063
chr6	109585112	110075854
chr6	107308181	107642574
chr6	106680464	106928012
chr6	105533726	106080359
chr6	104871393	105227739
chr6	102773173	104532633
chr6	100933254	102389643
chr6	117774191	118480996
chr6	119000170	121404759
chr6	121676562	122381728
chr6	122514906	122828032
chr2	108875865	109064158
chr10	70948632	71669111
chr10	69639881	69939434
chr10	64355855	67488183
chr10	63896872	64342110
chr10	62492568	62994254
chr10	60875616	61762322
chr10	58456296	59181206
chr10	56470170	58089215
chr10	53644410	56287810
chr21	44399098	44682367
chr12	105292978	106052990
chr12	106603911	106749289
chr12	106907719	107680483
chr12	102227798	103685796
chr12	100631313	101660082
chr12	98711512	99989865
chr12	96598406	98385373
chr12	95629445	95770927
chr12	94788739	94965511
chr12	93520509	94530466
chr12	92020827	92611316
chr12	91413225	91881582
chr12	89750371	91102096
chr12	88694372	88973188
chr12	88291693	88335677
chr12	85924084	87943758
chr12	83803107	85409204
chr12	82569712	83794701
chr12	80843405	82320300
chr12	78078694	79433881
chr12	77097351	77929168
chr12	74701771	75347787
chr12	71980167	74414621
chr12	70426756	71483865
chr12	68938151	69106731
chr12	67380839	68268720
chr12	66741547	67368649
chr12	63132440	63736178
chr12	61444684	62150619
chr12	58985725	60658829
chr12	58184672	58459286
chr22	31471012	31626130
chr7	45007477	46156752
chr7	46170275	47190421
chr7	47683254	50406034
chr7	50863709	54705532
chr2	67310962	67983454
chr2	66601306	67291456
chr2	65601959	66419129
chr2	64042543	64314600
chr2	62486082	63667055
chr2	58127319	60679625
chr2	56038054	58119979
chr2	54021634	54796394
chr5	173308634	174148852
chr5	169600176	171286272
chr5	168592364	169308622
chr5	166169654	168221760
chr5	163928676	166022693
chr5	160174767	163376637
chr5	159432142	159964580
chr5	158016709	158670702
chr5	156477682	157255257
chr5	180668372	181158244
chr5	178309743	179443475
chr5	133151009	133895872
chr5	151858344	152671507
chr5	152684931	153459021
chr5	153672129	154166635
chr17	14102473	15177614
chr17	13123427	14020817
chr17	12127470	12955004
chr17	10309288	11992323
chr17	9629235	9925971
chr17	5514415	6413663
chr17	2851335	3583958
chr17	29679096	30076285
chr17	32782174	34190556
chr17	34382560	34944026
chr17	35137210	35544269
chr17	36638442	36916501
chr17	60746861	61747231
chr17	58123406	58964879
chr17	55447123	56806363
chr17	52725806	55186276
chr17	51393732	52715757
chr17	48187542	48762725
chr17	40694570	41628415
chr17	46738973	47019445
chr17	47316346	62421759
chr17	63031104	63314439
chr17	66899255	67688724
chr17	65251051	66098885
chr17	68779303	69250117
chr17	69556697	72102138
chr17	72883327	74182833
chr17	79178463	79636860
chr7	92697526	92705922
chr2	24422609	25197082
chr2	21197836	23799343
chr2	19233923	19509047
chr2	17860206	18341478
chr2	16673665	17507878
chr2	16150884	16662906
chr2	13143832	15265852
chr2	7029077	8365060
chr2	5628357	6793073
chr2	3876460	5535578
chr2	1878304	3214408
chr2	318747	1517047
chr7	106307242	106893722
chr7	19163027	19579775
chr7	18044708	18652859
chr7	14574103	16498205
chr7	12709808	14551426
chr7	110688529	111677888
chr7	108634547	110579134
chr14	24687985	26882504
chr14	26896482	28728144
chr14	29563041	30465868
chr14	31567543	31922372
chr14	32891978	33706103
chr14	33716459	34276447
chr14	35962450	37078621
chr14	37268632	38987276
chr14	39547693	44831347
chr14	45354622	48317463
chr14	48597543	49526534
chr14	50940978	51189287
chr14	58507666	59092542
chr14	59499280	60488330
chr14	61308566	61447371
chr14	61891930	62335653
chr14	62347228	63151874
chr14	63871013	64303688
chr14	65445658	67215998
chr14	69866199	71116893
chr14	71850195	72461780
chr14	72471734	72831778
chr14	76043723	76844422
chr14	77125380	77423601
chr14	77798275	80752797
chr14	81597695	85523757
chr14	85564467	88393751
chr14	88831661	90192010
chr14	90892320	91285160
chr14	92164339	92991487
chr14	93343326	94005010
chr14	94377811	94599901
chr14	95570423	96096112
chr14	96661690	99335143
chr14	99984045	100160462
chr14	104005619	104564909
chr7	19713789	20116310
chr7	92690592	92761168
chr10	1616123	2619433
chr1	237729399	239729106
chr7	42429703	42728271
chr7	38996804	39344237
chr7	38249916	38621801
chr7	37266455	37785641
chr7	36484251	37061881
chr6	23278070	24348958
chr6	22506162	23263265
chr6	21115266	21530303
chr3	148639227	148847063
chr6	4161785	4762626
chr6	5512287	6509012
chr6	8218173	8727602
chr6	8941331	10366689
chr6	10821580	11038132
chr6	11795288	11978163
chr6	12378539	12847248
chr6	14034878	15037019
chr6	15734918	16098151
chr6	16928039	17317909
chr5	135493401	135843112
chr5	136278363	137662774
chr9	84391550	85406381
chr9	38745553	39362991
chr5	6936688	7812488
chr5	5803913	6317944
chr5	4515743	4966803
chr5	1871647	3801447
chr5	81005064	81134675
chr5	75863502	76208145
chr5	71814250	71962174
chr5	68518448	68969217
chr5	62917264	63741962
chr5	58521758	58818093
chr5	56318308	56728838
chr5	51014490	52477114
chr5	44948276	45872093
chr5	43843782	44615236
chr3	59126704	62336664
chr3	62361966	63804972
chr3	25822339	27226799
chr3	24029121	25354427
chr3	23305886	23771862
chr10	75360474	76380711
chr10	76432755	77976978
chr3	57292373	57509565
chr3	55421721	56061166
chr3	53400115	55413669
chr10	48667815	49680233
chr10	84540415	86377429
chr10	81415752	84076288
chr14	53332496	54220192
chr14	55961423	57182155
chr14	57453661	58162692
chr14	23638632	23927435
chr13	24626415	24850168
chr13	21638628	22792181
chr13	25366456	26073792
chr13	23320593	25255499
chr13	50157516	50853816
chr8	10929047	11215722
chr8	9918570	10446212
chr8	26700252	27187071
chr8	25630959	26035331
chr8	23821847	24873517
chr8	20349072	21085213
chr13	47065913	47859688
chr13	45605595	46247601
chr13	42623367	43682320
chr13	99778440	100943147
chr7	92727304	92761168
chr5	40887942	42352358
chr5	39583292	40577758
chr5	38241548	38746414
chr5	35050200	36067972
chr5	32737239	33230200
chr5	28628253	30939543
chr5	25785339	28039393
chr5	21381415	25222189
chr5	18469068	19160126
chr5	17316614	18459879
chr5	15142011	16390784
chr5	10992625	13821234
chr5	9583275	10169458
chr5	8946056	9331900
chr8	96758852	97550773
chr8	98182732	98474915
chr8	98845945	100396383
chr8	101360858	102196480
chr8	103740066	104724937
chr8	105858866	106267562
chr8	106800711	107883915
chr8	108266981	109440466
chr8	109748812	114744842
chr8	115777415	116403272
chr8	116909561	117568265
chr8	118142059	118927573
chr8	119072795	119425242
chr8	119989710	121452978
chr8	121663711	122626075
chr8	124052846	124238777
chr8	125815021	126794899
chr8	127517291	127695657
chr8	129010736	129777666
chr8	130800773	131922298
chr8	132001097	132715057
chr8	133588876	134707643
chr8	134901957	135616910
chr8	135746368	138087601
chr8	138400978	140396718
chr8	141392283	142540068
chr22	36589589	36938503
chr22	43227365	44984355
chr22	47207163	48735758
chr22	48760528	49646790
chr12	38626134	39215905
chr12	39818168	40108352
chr12	40415894	41455843
chr12	41462472	42007296
chr12	42506180	43711735
chr12	43832008	45131877
chr12	45408641	45726892
chr12	46211911	47617060
chr12	48201923	48526553
chr12	51428416	51922960
chr12	52292742	52857702
chr12	53801532	54140618
chr16	6039465	7145085
chr16	7159271	8523402
chr16	9165355	10668775
chr16	12217802	13916136
chr16	15395620	15789793
chr8	48613671	48925992
chr8	47797534	48385374
chr12	32481984	32901827
chr3	184848403	185251926
chr3	185979741	186679624
chr3	186716855	187708735
chr3	188990319	189230380
chr3	190806161	191175041
chr3	191197276	192781938
chr3	192901574	193566529
chr3	123345513	124528245
chr3	121601028	122341975
chr3	120797392	121519878
chr3	120122340	120167855
chr3	115851933	119100662
chr3	114124615	114234618
chr3	112826928	113605501
chr3	112108947	112498736
chr3	108733447	111485293
chr3	108419131	108503531
chr3	105927586	107053116
chr3	102726908	105321025
chr3	101063008	101180196
chr3	94574163	97566892
chr21	29628667	31038963
chr21	31891777	32215335
chr21	32910545	33053594
chr21	35638458	35942732
chr21	36574759	36897939
chr21	37607399	39094961
chr21	39454738	41217598
chr6	155393797	156540687
chr6	157403738	157587597
chr6	158977144	159604220
chr6	163612743	165875249
chr6	161386429	163373706
chr6	160122462	160477793
chr6	167153920	168064015
chr6	169449306	170289867
chr5	96878222	98983290
chr6	47652039	49424059
chr6	45787977	47462463
chr6	44503817	45279333
chr6	39786280	41286938
chr3	17714951	19044158
chr3	19265740	19898283
chr2	106782274	108181759
chr5	103741282	107210986
chr5	107757749	108100892
chr5	109924867	110672899
chr18	7802132	8519769
chr18	6941734	7790938
chr18	5612196	6510931
chr18	3770625	5180741
chr2	29221548	30058002
chr2	30748400	31171526
chr2	33716818	36270829
chr2	39885444	41204664
chr2	41241450	41793866
chr2	44434288	45420092
chr2	45676451	46388317
chr2	48863595	51470690
chr18	1570672	2413181
chr18	2422423	2616711
chr10	28661781	29344511
chr10	27458856	28394598
chr10	35639318	36784381
chr18	294551	581989
chr18	22043950	22549111
chr18	23046150	23377787
chr18	24557246	25140294
chr18	25482773	25968160
chr18	26396856	27833810
chr18	28277199	31554561
chr18	32531791	33542795
chr18	33662057	34966266
chr18	35810503	42058917
chr18	42076426	43419609
chr5	111158806	111624594
chr5	111635487	112686562
chr5	139832162	140031876
chr5	140786069	141401789
chr5	142187131	143169998
chr5	143881783	146089198
chr5	146333967	148245211
chr5	113581786	115429794
chr5	116156106	118940091
chr5	119532155	121941741
chr5	122199178	122732802
chr5	123082240	123279948
chr5	123663357	124584799
chr5	124877882	126328173
chr5	126879581	127969357
chr5	128377658	131003195
chr18	56780350	57448676
chr18	58544922	58619139
chr18	59155846	59236347
chr18	60039479	60534353
chr18	55949098	56577588
chr18	54514210	55064446
chr18	51257268	54086312
chr18	49860822	50659673
chr18	47211314	47758201
chr18	46320088	46725280
chr18	43776989	45237178
chr18	77311065	78841730
chr18	75595403	76146864
chr11	66715114	67025449
chr11	64404192	64665966
chr11	59741405	60728106
chr11	58748423	59504522
chr9	79514090	80164231
chr9	78591034	79494479
chr9	75231618	76295218
chr9	70683785	71203240
chr9	69462604	70007721
chr9	68552003	68952263
chr9	248731	1969711
chr9	2944352	3246348
chr10	50811139	52739776
chr10	88066079	88791817
chr10	89795405	90863602
chr10	92718550	93247792
chr10	93643701	94288053
chr10	95516157	96730113
chr10	97820999	98188834
chr10	98455599	99367389
chr10	100574375	100869067
chr10	101088279	101539442
chr10	104363214	109868301
chr10	111020482	112287746
chr10	114972038	116224130
chr10	116431960	117245834
chr10	117549189	118533188
chr10	14119328	14806254
chr10	9439126	10439472
chr10	8038648	9432873
chr10	6455766	7652645
chr10	15427585	16702130
chr10	17277323	17592901
chr10	17794034	18587423
chr10	18608170	21400669
chr10	21882251	22299445
chr10	22578860	23286900
chr10	23523210	24542032
chr10	25149026	25832457
chr10	25835687	26143969
chr2	112974504	113379867
chr9	123246268	123881345
chr2	139694026	140659707
chr2	140662747	143115280
chr2	144564121	145716331
chr2	145986953	147901280
chr2	148131364	148635884
chr2	149026966	150003567
chr2	150682156	151238647
chr2	151485615	152101508
chr2	152776592	155236046
chr2	155284400	156279151
chr2	156557079	157662217
chr2	158048629	158350495
chr2	161446893	163161968
chr2	163173482	164431210
chr2	165343670	167928959
chr2	168125904	168327151
chr2	170244166	170863165
chr2	175250563	176054409
chr2	176679232	177124545
chr2	177797687	178241002
chr2	178319240	178871667
chr2	179426499	179910771
chr2	180015768	180923312
chr2	180928409	181688067
chr2	181983588	182644253
chr2	183222995	186429607
chr2	186867350	187293325
chr11	44363829	45717905
chr11	41590670	43264651
chr11	37010108	37869621
chr11	31711603	32010277
chr11	30190195	31262420
chr11	29462599	29919699
chr11	28852506	29172428
chr15	37275915	37730771
chr15	45454014	45530738
chr20	52278610	53491719
chr20	54256320	56291364
chr20	56621735	58129761
chr20	58533035	59481159
chr20	59715072	61836387
chr8	77204991	77215235
chr8	77613052	78318231
chr8	82589370	84263597
chr8	84358349	84926828
chr3	173016258	174280217
chr3	168272881	168711301
chr3	170626921	178960461
chr3	179729007	180573005
chr3	182110437	182165674
chr4	125773201	126651885
chr4	126659664	127359331
chr4	129628292	132901081
chr4	132933707	137229036
chr4	137860763	138762703
chr4	139780104	139987732
chr13	39842160	40560897
chr13	37639915	38851290
chr13	36513038	36754353
chr13	34178522	34779947
chr3	150048750	150142542
chr3	150908139	151205010
chr3	152585457	153027716
chr3	153304308	154229874
chr3	154493996	155243391
chr3	155260333	155705609
chr3	157520706	158606524
chr3	158846160	159658789
chr3	161468119	162125401
chr3	162359725	165184323
chr3	165221411	167923830
chr4	160542264	162152837
chr4	159502473	160314867
chr4	156944063	158584634
chr4	156223238	156723080
chr4	154462858	155836093
chr4	153815326	154455801
chr4	151412040	152360640
chr4	150045230	151026927
chr1	157163291	157968845
chr1	152340660	153201091
chr1	147292125	147871464
chr1	119221580	119474472
chr1	117994853	118876619
chr1	117525832	117857638
chr1	115817675	117032591
chr1	114886454	115243328
chr1	111799396	112307011
chr1	110560730	111325895
chr1	106685989	107631160
chr1	103929520	106207912
chr1	103347644	103719951
chr1	101536307	103340264
chr1	96948936	99425795
chr1	95343330	96199637
chr4	114930481	117794848
chr4	110649300	111923667
chr4	108287536	109308730
chr4	106421809	106763208
chr1	88193369	88228682
chr8	89035554	89570810
chr8	87551257	88819575
chr8	86728452	87109495
chr8	62182366	62897477
chr6	97331063	98765169
chr6	95547696	96678970
chr6	92859252	95199561
chr6	90708680	92602826
chr6	87732141	88577084
chr9	27396340	28335718
chr9	29435932	31638532
chr9	31652152	32220061
chr9	32658202	32908811
chr9	34786894	34828829
chr9	34672180	34690065
chr9	36739327	37007733
chr9	98372734	98684868
chr9	99322987	99831785
chr9	100632414	101364436
chr9	101638697	102184093
chr9	102276612	103291810
chr9	103411311	104066367
chr9	104172171	104743350
chr9	105674483	106796522
chr9	107511692	108542573
chr9	113832217	114051329
chr9	114966553	116154628
chr9	116726073	117622562
chr9	117844917	119141439
chr9	119159425	120372835
chr9	80378605	81558481
chr9	81716928	83067866
chr9	7260152	8719881
chr9	8808692	10372406
chr9	10624554	12639543
chr9	13465585	13953725
chr9	14475950	15135766
chr9	15694907	16100768
chr9	17272417	18234799
chr9	18536512	18974227
chr9	19497950	20158146
chr9	22469088	23561872
chr9	23973697	24555431
chr9	24682118	27219409
chr1	59893248	61027538
chr1	61289147	62268887
chr1	64292323	64728774
chr1	65344779	66217808
chr1	66498211	66864025
chr1	56831311	58465630
chr1	48735341	50152116
chr1	38085708	38789056
chr1	36564902	37391787
chr1	33527120	34693131
chr1	29269397	30690474
chr1	19969858	20431123
chr1	17697369	18690569
chr1	13975501	15098109
chr1	11328521	11554964
chr1	6783523	7628045
chr1	3909286	5910312
chr1	2607014	3554523
chr7	88405532	90068647
chr7	82831721	83303810
chr7	79282490	80312750
chr7	78109864	79222398
chr7	103464269	104097881
chr7	104276364	104821985
chr7	152816385	155181536
chr7	155531266	156639191
chr4	4916200	5502020
chr4	10621320	13146056
chr4	13654529	15339147
chr4	20903823	22402820
chr4	22659460	23771100
chr4	23792771	24427152
chr4	24655361	24923614
chr4	27269857	30559378
chr4	32841073	37120406
chr4	41360027	41826153
chr4	42294652	44591115
chr4	44818107	47344088
chr4	54354954	55013472
chr4	57332078	58777695
chr4	63363270	67200723
chr4	68647044	70411369
chr4	71415468	72697705
chr4	74940955	75327306
chr4	77985777	78462648
chr4	80105035	81031163
chr4	81489194	82249764
chr4	83675167	84527007
chr4	85811839	86366429
chr1	90098743	90734514
chr22	25482947	26293167
chr12	107931579	108349208
chr12	118432105	119622336
chr12	117235718	117940230
chr12	113518893	115758275
chr12	112658477	112940552
chr12	125453728	128678081
chr12	128697648	131415998
chr7	71451188	72476705
chr7	68523435	70764926
chr7	67558461	68290494
chr7	100014878	100215323
chr7	3024873	4433857
chr13	26340356	26384043
chr7	93407976	93801129
chr7	95755983	95819463
chr7	97180627	97795518
chr7	8472585	10921326
chr7	11263415	12033141
chr7	113196708	114848041
chr7	115149545	115987744
chr7	117908230	120733768
chr7	121598221	123469892
chr7	123867710	124824318
chr7	125038488	127242073
chr7	131720322	132772229
chr7	133088060	134220530
chr7	136021693	137120775
chr7	137465771	137850628
chr7	141043753	141638047
chr7	141836459	142919729
chr7	142929111	143193478
chr7	143926857	144158159
chr7	144916146	146112319
chr7	146121619	148194850
chr7	150448679	150861308
chr7	23734495	24555591
chr7	25182576	25578900
chr7	27230155	27536869
chr7	28037496	28648454
chr7	28658185	29917651
chr7	31151132	32453749
chr4	88855157	90061022
chr4	90400371	91103371
chr4	91200364	93403323
chr4	93771137	94160289
chr4	121265465	121478224
chr4	120057470	120664966
chr2	86821130	88454009
chr2	80482214	84324426
chr2	75723074	80392494
chr2	75029028	75544544
chr3	13150231	13344024
chr3	64530627	65684342
chr3	66959217	67731557
chr3	67736916	68891122
chr3	69448876	69655426
chr3	69995944	70512302
chr3	71294246	71808982
chr3	73219255	73378587
chr3	73903111	75009429
chr3	103023	341013
chr3	630032	2893690
chr3	3503454	4236807
chr3	5588001	8260248
chr3	10462954	11262815
chr10	42970983	43063163
chr12	1882105	2637881
chr12	5056236	5983354
chr12	13470308	14138379
chr12	23737618	24642405
chr12	27979947	28564276
chr12	28895789	30422052
chr12	32242558	32384500
chr7	92750071	92761168
chr19	54082831	55067923
chr19	56774443	57235594
chr19	33467774	34125557
chr19	30040485	32337237
chr19	28834357	29594455
chr19	50823077	51090128
chr11	17449426	17952292
chr11	20636154	22270582
chr15	25963519	28033994
chr15	31503044	32286857
chr15	28880298	29670503
chr15	101322812	101725667
chr15	99950926	100527018
chr15	96798726	98411274
chr15	94196473	95210425
chr15	92116250	92695888
chr15	91071293	91839405
chr15	85859455	88242965
chr15	81416571	81976868
chr11	88012079	89336937
chr11	83525038	85479534
chr11	81964754	82840899
chr11	78867350	81356775
chr11	78249328	78659631
chr11	4515964	5473039
chr11	6765978	8439921
chr11	13882041	14182597
chr11	15254568	16608242
chr16	17478264	18164117
chr16	16632801	17265521
chr16	19940914	20491582
chr16	21021917	21946539
chr16	22655952	23025128
chr16	23822903	24500307
chr16	25270484	27111231
chr10	120019539	120776988
chr10	123079696	124357754
chr10	125234186	125635197
chr10	126014293	127813433
chr10	128205381	129417541
chr10	130209766	131826940
chr10	132812145	133141801
chr11	1100744	2275538
chr11	2451880	2876293
chr13	103254914	104969555
chr13	105286804	106270229
chr13	106614607	110028991
chr13	113896605	114015296
chr8	770571	958992
chr8	2158772	4604246
chr8	4835317	6335635
chr8	39281118	41441993
chr8	36867515	37680661
chr8	33713555	36820056
chr8	30886033	32166972
chr8	29426379	30532415
chr8	9047284	9533535
chr8	13885168	15419201
chr8	16279580	16690719
chr8	17368667	17802551
chr4	189053107	189903310
chr4	187169941	187721469
chr4	185283940	186750957
chr4	183738198	184380883
chr4	177614037	180827077
chr4	174400372	175906038
chr4	171994038	172764891
chr4	170367759	170964236
chr4	168605269	169260690
chr4	165512878	166337906
chr4	164285016	164762400
chr4	163606054	164276228
chr8	19288504	20320465
chr22	33265704	33704652
chr22	33936889	35196712
chr4	148050241	149971177
chr4	145979294	147611576
chr4	143578007	145060998
chr4	142446899	143157808
chr4	140328892	142306586
chr16	47026669	48274149
chr16	48680432	49980746
chr16	50899808	52165148
chr16	52178183	52989559
chr16	54135205	55544470
chr16	55557136	55853648
chr16	58818190	61006036
chr16	61245115	63476247
chr16	64163273	64802226
chr16	65090825	66567090
chr16	73079702	74263039
chr16	72117898	72809594
chr16	70817416	71594625
chr16	75868481	77165388
chr16	77212375	78032667
chr16	78498867	79772417
chr16	79841180	80982012
chr16	81670079	81946638
chr16	82833579	83726346
chr1	233135006	234297058
chr10	33643283	34276745
chr11	106315611	106999680
chr11	105221768	105915339
chr11	104178296	104858548
chr11	103204897	103678081
chr11	102528180	102953672
chr11	100919397	101903343
chr11	96444277	100641100
chr11	94981121	95707414
chr11	93821537	94410813
chr11	90127364	90655660
chr7	33249974	33814176
chr7	34361736	34890277
chr7	35065646	35568642
chr11	134276780	134973645
chr11	130445866	133910045
chr11	129361971	129830902
chr11	128665904	129055862
chr11	126637297	128374757
chr11	125669862	126162901
chr11	122222278	123023054
chr11	120511164	121587226
chr11	119757636	120112636
chr11	117370941	118309026
chr11	113896412	116719520
chr11	113322377	113716001
chr11	112292616	112911642
chr11	110345848	111337551
chr11	108875716	110071314
chr15	76341194	76857907
chr15	70931621	71749231
chr15	70226072	70471228
chr15	69538958	70017571
chr15	66015051	66230628
chr15	60535635	61909055
chr15	59720650	60291298
chr15	57742889	58571674
chr15	54111255	55106172
chr15	52797748	53952725
chr6	53989890	55919779
chr6	73970037	75498619
chr6	75940729	78685333
chr6	79267560	79400854
chr6	80423473	82133847
chr6	82403569	83021142
chr6	83656662	84687217
chr15	79455575	79858954
chr3	146720135	148337342
chr3	144308111	146004527
chr3	143152266	143715971
chr3	139753880	140832977
chr3	138983329	139269571
chr3	137171226	137775767
chr3	134640969	135852824
chr3	132754626	133332909
chr3	131065912	132197319
chr3	130212791	130771065
chr3	50778348	51227261
chr3	33919164	36850076
chr3	30756458	31986484
chr3	28412817	29084530
chr3	27802792	28246027
chr3	37421635	37813036
chr3	38337640	39013437
chr3	39501936	40213589
chr3	40990454	42504854
chr3	43727937	44727647
chr3	45502845	45602593
chrX	50280313	50527778
chrX	37688771	38073851
chrX	38347778	39449951
chrX	40284083	40441082
chrX	42324658	43556731
chrX	44287214	44762635
chrX	45930278	46295886
chrX	116949216	118309868
chrX	121006297	123304704
chrX	125182039	126547783
chrX	126566219	128909672
chrX	130422192	130825243
chrX	131024600	131634118
chrX	133017991	134063027
chrX	137046285	137321042
chrX	137645724	138529245
chrX	138841651	139630961
chrX	140145601	144017231
chrX	145365047	146760314
chrX	148149811	149144761
chrX	149975225	150336202
chrX	152137283	152575267
chrX	10447550	10520082

## Sheet: Type I NADs liftover to hg38
chr8	72353232	72806996
chr6	50153153	51221466
chr6	51531801	52026408
chr6	72556151	73081814
chr6	67191815	69554178
chr6	64011022	66965574
chr6	62785464	63120257
chr6	62484855	62671706
chr6	60744251	62079654
chr2	103182248	104829124
chr2	105928087	105963006
chr2	195787272	196122744
chr2	193075912	195464725
chr2	192267424	193000825
chr2	190543771	190788395
chr2	189809129	190200432
chr2	195732178	196058358
chr2	196581631	196720205
chr2	198397884	199111402
chr2	199749030	199884746
chr2	204162144	205331391
chr2	208544697	209313778
chr2	209618104	209919647
chr2	210291010	210393330
chr2	210539160	212571828
chr2	213268827	214570118
chr2	214825121	215104984
chr2	216727716	217704270
chr2	219759105	221262467
chr2	222995778	223702370
chr2	224025278	224377024
chr2	224646868	225630528
chr2	227063965	227300341
chr2	227745796	229696421
chr18	64040727	67182274
chr2	117256217	117723083
chr2	114806642	117057298
chr2	114077871	114495797
chr2	132588169	133163191
chr2	133807417	134079266
chr2	136438885	136950950
chr2	137147502	137850173
chr1	199007861	199914736
chr1	181303884	181933216
chr1	176963140	177903059
chr1	166451521	166678744
chr1	165501226	165536738
chr1	162128311	162178575
chr1	210709244	210728622
chr1	208525615	208858346
chr10	14339315	14433764
chr10	14352854	14352909
chr10	14352852	14352909
chr10	14352871	14352909
chr10	14352839	14352871
chr10	14352871	14352902
chr10	9439126	10439472
chr10	8192419	9432873
chr10	7534264	7652645
chr10	6455766	7390819
chr10	15889058	16079876
chr10	16255583	16427929
chr10	17277323	17589093
chr10	17794034	18587423
chr10	18701588	21383866
chr10	22012340	22214293
chr10	22732913	22958242
chr10	23550712	24038383
chr10	25152993	25675743
chr2	138660233	138787590
chr2	139694026	140659707
chr2	140662747	143002910
chr2	146584391	147836918
chr2	148533680	148635884
chr2	149073007	149340197
chr2	152776592	153417084
chr2	153551401	153663920
chr2	154046844	154731804
chr2	155155592	155236046
chr2	155284400	156279151
chr2	156592214	157335335
chr2	158048629	158343719
chr2	161446893	161993573
chr2	162141244	163161968
chr2	163173482	163552974
chr2	163831518	164431210
chr2	165343670	165817812
chr2	165995945	167928959
chr2	175250563	175879949
chr2	176777589	177124545
chr2	177799952	178063632
chr2	178537366	178871667
chr2	179426499	179910771
chr2	180071404	180923312
chr2	180928409	180958248
chr2	181116453	181688067
chr2	182041765	182644253
chr2	183222995	186429607
chr2	186867350	187293325
chr11	41590670	43250125
chr11	37010108	37869621
chr11	31887065	32010277
chr11	31711603	31775542
chr11	30364571	31262420
chr11	29483502	29875430
chr15	37275915	37730771
chr20	52491150	53178364
chr20	54280652	56004343
chr20	58533035	58574486
chr19	12076691	12076732
chr20	60090955	61315392
chr8	77204991	77215235
chr8	82589370	84263597
chr8	84358349	84926828
chr3	173016258	174280217
chr3	168272881	168711301
chr3	178419728	178960461
chr3	179729007	180573005
chr4	125773201	126560275
chr4	127173582	127359331
chr4	129628292	132901081
chr4	132933707	137229036
chr4	137865249	138147685
chr13	37662188	38343936
chr13	34205945	34779947
chr3	150048750	150142542
chr3	150908139	151108590
chr3	152585457	153025836
chr3	153304308	154229874
chr3	154493996	154852598
chr3	155191966	155243391
chr3	155260333	155302696
chr3	155427154	155705609
chr3	158860836	159658789
chr3	161468119	162125401
chr3	162359725	165184323
chr3	165221411	167654134
chr3	167769936	167923830
chr4	160542264	162152837
chr4	159541157	160314867
chr4	158259925	158584634
chr4	157052191	157973984
chr4	156223238	156365038
chr4	155512493	155836093
chr4	154661152	155351780
chr4	154462858	154502349
chr4	153897872	154455801
chr1	152340660	153201091
chr1	152050295	152057574
chr1	147293202	147492549
chr1	119221580	119474472
chr1	117994853	118876619
chr1	117696460	117836987
chr1	110639392	110965272
chr1	106685989	107631160
chr1	103929520	106207912
chr1	103347644	103500618
chr1	101536307	103340264
chr1	98765433	99425795
chr1	96948936	98632649
chr1	95343330	96199637
chr4	117769111	117794848
chr4	114930481	117527083
chr4	110649300	111923667
chr4	108703223	109308730
chr4	106617659	106747280
chr4	106421809	106479684
chr1	88193369	88228682
chr8	89035554	89570810
chr8	87551257	88819575
chr8	86728452	87109495
chr8	62182366	62897477
chr6	97331063	98765169
chr6	96620474	96678970
chr6	95663172	96508120
chr6	92859252	93608345
chr6	91041633	92602826
chr6	88503337	88577084
chr6	87732141	88359584
chr9	27583652	28335718
chr9	29435932	31638532
chr9	31652152	32220061
chr9	32658202	32908811
chr9	99446622	99775894
chr9	100632414	101344165
chr9	101638697	102184093
chr9	102276612	103248115
chr9	103411311	104066367
chr9	104203978	104743350
chr9	105871251	106239048
chr9	116742546	117622562
chr9	117844917	118570873
chr9	119373990	120372835
chr9	80378605	81558481
chr9	81716928	83067866
chr9	7260152	8719881
chr9	8808692	10372406
chr9	10624554	12639543
chr9	14787832	15096807
chr9	17531820	18234799
chr9	18536512	18974227
chr9	19497950	20158146
chr9	22469088	23561872
chr9	23973697	24555431
chr9	24682118	25638798
chr9	26600629	26844411
chr9	27113042	27219409
chr1	59893248	61027538
chr1	61469497	61627207
chr1	65513964	66217808
chr1	66498211	66673871
chr1	56836945	58465630
chr1	48735341	50152116
chr1	38667710	38788357
chr1	34210965	34682547
chr7	88405532	90068647
chr7	82831721	83303810
chr7	79282490	80312750
chr7	78124011	79222398
chr7	103464269	104097881
chr7	104276364	104821985
chr7	153197262	154780798
chr7	155830451	156639191
chr4	5052357	5276984
chr4	10621320	13146056
chr4	13654529	14992172
chr4	15167941	15339147
chr4	20903823	21990100
chr4	22203993	22348386
chr4	22659460	23477549
chr4	23595836	23771100
chr4	23792771	24427152
chr4	24667890	24923614
chr4	27269857	30559378
chr4	30596279	30703746
chr4	32841073	37120406
chr4	41360027	41587886
chr4	41720869	41826153
chr4	42294652	44591115
chr4	44818107	47344088
chr4	54716989	54911922
chr4	63363270	67200723
chr4	68647044	70411369
chr4	71415468	72697705
chr4	74940955	75327306
chr4	77985777	78462648
chr4	80105035	81020935
chr4	81489194	81679573
chr4	83675167	83844937
chr4	84061599	84461014
chr4	86016897	86366429
chr1	90098743	90731460
chr12	118780961	118971676
chr12	125453728	128620903
chr12	128929326	130281468
chr12	130000117	130032620
chr7	71797251	72476705
chr7	69628046	70580955
chr7	3233065	3886633
chr7	4306509	4433857
chr7	93407976	93801129
chr7	95755983	95819463
chr7	97180627	97607220
chr7	8472585	10921326
chr7	11263415	11356102
chr7	113196708	113298511
chr7	113447086	114848041
chr7	115149545	115987744
chr7	117908230	118110864
chr7	118283761	120733768
chr7	121615087	123469892
chr7	123867710	124824318
chr7	125038488	127242073
chr7	136041733	137120775
chr7	141836459	142919729
chr7	142929111	143193478
chr7	143926857	144158159
chr7	144916146	146112319
chr7	146121619	148194850
chr7	150467273	150861308
chr7	23734495	24341621
chr7	28106840	28648454
chr7	28658185	28821629
chr7	28960463	29836337
chr7	31151132	31956795
chr7	32095389	32453749
chr4	88855157	89018978
chr4	89214385	89918337
chr4	90400371	91103371
chr4	91200364	93403323
chr4	93771137	94127947
chr4	121265465	121478224
chr4	120057470	120664966
chr2	80482214	84324426
chr2	75723074	80392494
chr2	75076051	75499391
chr3	67206218	67335149
chr3	68354305	68858495
chr3	69448876	69650526
chr3	69995944	70512302
chr3	73903111	75009429
chr3	103023	341013
chr3	630032	2893690
chr3	3503454	4236807
chr3	5588001	8260248
chr12	5632302	5794493
chr12	5115405	5409143
chr12	13470308	14138379
chr12	28013635	28564276
chr12	28895789	30241660
chr19	31793142	32217377
chr19	30723199	31250240
chr11	20679116	22156389
chr15	26140366	28033994
chr15	25963519	26027601
chr15	23733260	23856554
chr15	31537902	32286857
chr15	28880298	28909707
chr15	29160885	29670503
chr15	98114948	98375241
chr15	97781680	97938614
chr15	97287573	97718447
chr15	94688837	95001711
chr15	94234483	94575057
chr15	92135497	92681739
chr15	91071293	91839405
chr15	85864613	88233561
chr15	81434508	81976868
chr11	88012079	89336937
chr11	83525038	85479534
chr11	81964754	82840899
chr11	79985064	80938585
chr11	5314210	5473039
chr11	6765978	7943583
chr11	8108962	8218710
chr11	8383510	8439921
chr11	14013335	14182597
chr11	15319443	16608242
chr16	17532157	18164117
chr16	19940914	20491582
chr16	21021917	21946539
chr16	22655952	23025128
chr16	23822903	24019127
chr16	24129858	24500307
chr16	25270484	27074028
chr10	120019539	120762282
chr10	125254431	125635197
chr10	128205381	129408680
chr10	130215289	130970712
chr13	103254914	104969555
chr13	105286804	105576822
chr13	106633680	106843230
chr13	106958116	107121842
chr13	108345971	108789298
chr8	2335892	4604246
chr8	4835317	6335635
chr8	40221209	40837267
chr8	39392300	39918233
chr8	37237680	37351361
chr8	33843432	36820056
chr8	31281679	31954927
chr8	13885168	15419201
chr8	16279580	16690719
chr8	17409854	17490227
chr4	189053107	189885603
chr4	187169941	187721469
chr4	186339446	186551588
chr4	185439446	186032051
chr4	183917118	184131182
chr4	177614037	180827077
chr4	171994038	172764891
chr4	170367759	170964236
chr4	165591568	166337906
chr4	164285016	164762400
chr4	163606054	164276228
chr4	163214768	163296378
chr4	162582871	163087285
chr22	33265704	33434991
chr22	33936889	35196712
chr4	148470008	149971177
chr4	146949456	147319031
chr4	143619999	145043453
chr4	142446899	143120622
chr4	141870071	142121905
chr4	141238686	141590761
chr16	48687595	48798188
chr16	49021784	49250517
chr16	51178646	52165148
chr16	52178183	52989559
chr16	55842116	55849964
chr16	58818190	61006036
chr16	61245115	63476247
chr16	64163273	64802226
chr16	65178601	65306069
chr16	73259467	73977252
chr16	72141911	72484022
chr16	75868481	77132208
chr16	77250579	78032667
chr16	79124078	79347814
chr16	80767080	80932523
chr16	81940858	81946638
chr16	82833579	83726346
chr11	106315611	106999680
chr11	105221768	105915339
chr11	104178296	104858548
chr11	103204897	103678081
chr11	102528180	102953672
chr11	100957404	101903343
chr11	96444277	100641100
chr11	93887557	94046244
chr11	90127364	90174543
chr7	35080017	35522939
chr7	36020256	36142127
chr11	134276780	134343032
chr11	131755097	133059556
chr11	130574065	130729313
chr11	129460469	129645378
chr11	127523363	127943872
chr11	115196714	115568165
chr15	61266003	61798569
chr15	60789143	60908119
chr15	59741265	59933785
chr15	54177965	55099845
chr15	52808176	53870318
chr6	54005310	55919779
chr6	73985361	74432505
chr6	74651784	74992580
chr6	75312021	75498619
chr6	75940729	78685333
chr6	79271221	79400854
chr6	80423473	82133847
chr6	82403569	83021142
chr6	83656662	83811425
chr15	79455575	79858954
chr3	146720135	148337342
chr3	144308111	146004527
chr3	139753880	140832977
chr3	138983329	139244317
chr3	137171226	137746633
chr3	134867078	135852824
chr3	134668834	134788927
chr3	132754626	133332909
chr3	131522903	132197319
chr3	131065912	131350470
chr3	36759879	36850076
chr3	33925040	36552019
chr3	30963311	31515169
chr3	28654667	29084530
chr3	28412817	28538497
chr3	27809107	28220192
chr6	150419264	150802122
chr6	153287486	153978051
chr6	147683302	148046942
chr6	146990054	147054810
chr6	145336816	145604879
chr6	141700472	141987434
chr6	138117387	138393852
chr6	137321248	137604612
chr6	136925552	137175391
chr6	135642844	136082869
chr6	134051330	134120209
chr6	133613505	133898636
chr6	132559018	132712699
chr6	126263302	127109520
chr6	122968764	123605894
chr6	114043457	115800037
chr6	105533726	106080359
chr6	105110020	105227739
chr6	102793293	104532633
chr6	100933254	101390698
chr6	117319541	117419129
chr6	117774191	118480996
chr6	119000170	119283467
chr6	119440139	121404759
chr6	121676562	122372999
chr10	64355855	67488183
chr10	63913495	64342110
chr10	56483514	58089215
chr10	53841832	56285836
chr12	107134584	107264263
chr12	102967671	103601223
chr12	102227798	102427805
chr12	100667629	101253502
chr12	99050132	99989865
chr12	96598406	98385373
chr12	88767061	88961196
chr12	88291693	88335677
chr12	80843405	82320300
chr12	78078694	79433881
chr12	77342772	77919088
chr12	77097351	77249165
chr12	74701771	75347787
chr12	71980167	74414621
chr12	70782171	71483865
chr12	67686684	68257897
chr12	66915733	67243415
chr12	63132440	63736178
chr12	61444684	62150619
chr12	59158341	60658829
chr12	58985725	59059013
chr12	58184672	58459286
chr7	45406497	45511620
chr7	46351715	47190421
chr7	48025525	50083397
chr7	51106734	54705532
chr2	67310962	67983454
chr2	66601905	67291456
chr2	65660335	66385037
chr2	63093135	63494638
chr2	60602408	60679625
chr2	60348610	60479152
chr2	58247527	60124129
chr2	56038054	58029750
chr2	54181598	54310883
chr5	170653563	171283171
chr5	170192721	170502027
chr5	166169654	168197098
chr5	163928676	166022693
chr5	160470221	163376637
chr5	156655415	157096625
chr17	14386130	15123564
chr17	13123427	14020817
chr17	12193711	12440484
chr17	11464243	11962584
chr17	10855307	11231446
chr17	10378510	10598547
chr17	5587137	6292397
chr17	33296037	34090142
chr17	34445443	34554768
chr17	55846837	56525761
chr17	54603188	54880413
chr17	53466596	54169760
chr17	52725806	53324833
chr17	51393732	52715757
chr17	65607268	66098885
chr17	65251051	65476464
chr17	68843453	69250117
chr17	69574589	71693986
chr17	73650093	74010050
chr2	21197836	23320961
chr2	17880839	18341478
chr2	16673665	17507878
chr2	16184550	16662906
chr2	13143832	15135340
chr19	11949916	11950197
chr19	12075738	12075766
chr2	7131181	8204338
chr2	5628357	6793073
chr2	3876460	5535578
chr2	1878304	2496698
chr2	759690	1517047
chr2	318747	526704
chr7	106307242	106793922
chr7	19163027	19579775
chr7	18044708	18271130
chr7	14574103	16498205
chr7	14000169	14551426
chr7	12753266	13842416
chr7	111600817	111677888
chr7	108634547	110579134
chr14	24687985	26882504
chr14	26896482	28728144
chr14	30001523	30465868
chr14	35962450	36222331
chr14	36332683	36498280
chr14	36790725	37078621
chr14	37282134	37467242
chr14	37617787	38966287
chr14	39547693	40297513
chr14	40458989	44831347
chr14	45354622	48317463
chr14	48597543	49059934
chr14	59542782	59865130
chr14	61891930	62114175
chr14	65500657	65763243
chr14	66680506	67197518
chr14	71953962	72461780
chr14	77943157	80610248
chr14	81597695	85316583
chr14	85635647	87890740
chr14	92172102	92349299
chr14	93346243	93704895
chr14	97112025	97375948
chr14	97485131	98518388
chr10	1616123	2619433
chr7	42429703	42728271
chr7	38996804	39344237
chr7	38249916	38621801
chr7	36484251	36926941
chr6	4164910	4477974
chr6	4608655	4762626
chr6	6093636	6353807
chr6	8543439	8696005
chr6	8941331	10296338
chr6	11815189	11978163
chr6	12660778	12847248
chr6	14320723	14501526
chr5	136863968	136992547
chr5	137114372	137561185
chr9	84422435	85406381
chr9	38745553	39362991
chr19	12076087	12076126
chr5	6936688	7790077
chr5	5803913	6317944
chr5	4575962	4966803
chr5	3739732	3801447
chr5	2828140	3557243
chr5	1898683	2682577
chr5	75863502	76208145
chr5	68518448	68969217
chr5	62917264	63741962
chr5	56325547	56728838
chr5	51507062	51721906
chr5	51014490	51342917
chr5	44948276	45683303
chr3	59126704	59316951
chr3	59877041	61527762
chr3	62433335	63801679
chr3	25822339	27226799
chr3	24530624	24989598
chr3	24314835	24412354
chr3	24029121	24160308
chr3	54089278	54831081
chr3	53400115	53510076
chr10	49014989	49241483
chr10	48063809	48214859
chr10	84550698	86218965
chr10	81415752	84076288
chr14	57496200	57735579
chr14	23675274	23927435
chr13	24727591	24850168
chr13	21647109	22792181
chr13	25366456	25889798
chr13	50204718	50824183
chr8	26727204	26918426
chr8	24293398	24860173
chr8	23821847	24179583
chr8	20415621	21085213
chr5	40887942	41727813
chr5	35050200	36067972
chr5	28628253	30939543
chr5	25785339	28039393
chr5	21381415	25222189
chr5	18469068	19160126
chr5	17403420	18459879
chr5	15142011	16390784
chr5	11115207	13821234
chr5	9583275	10149701
chr5	8946056	9331900
chr8	101812655	102038254
chr8	103740066	104225117
chr8	106800711	107239310
chr8	107507520	107883915
chr8	108603767	109247433
chr8	109389939	109440466
chr8	109748812	114744842
chr8	117105267	117452238
chr8	118448570	118729263
chr8	119080104	119366326
chr8	120518927	121238209
chr8	125815021	126794899
chr8	130818140	131894196
chr8	132051725	132715057
chr8	133686674	134445631
chr8	134927061	135616910
chr8	135746368	138087601
chr8	139043013	139787579
chr22	47207163	48455497
chr22	48719469	48735758
chr22	48760528	49527122
chr12	33368511	33983552
chr12	39853252	40097158
chr12	40415894	41455843
chr12	41462472	42007296
chr12	42800614	43711735
chr12	43899905	45122222
chr16	6039465	7131612
chr16	7304478	8523402
chr16	9476908	10485152
chr16	12911957	13916136
chr12	32545363	32647757
chr3	190806161	191175041
chr3	191197276	191279078
chr3	191434246	192781938
chr3	193056400	193558147
chr3	121851588	122219775
chr3	120802142	121427682
chr3	115851933	119021343
chr3	112410436	112498736
chr3	112139361	112327891
chr3	111207351	111485293
chr3	109483357	110993236
chr3	108419131	108503531
chr3	106232467	107053116
chr3	102726908	105321025
chr3	101063008	101180196
chr3	94574163	97566892
chr21	29628667	31038963
chr21	39515330	40404705
chr21	40786717	40942860
chr21	41158603	41217598
chr6	155393797	156516349
chr6	163622380	165205408
chr6	161422916	163085067
chr6	48089983	49424059
chr6	46901732	47296810
chr6	40023972	40182679
chr3	16278402	17063052
chr3	17772147	19044158
chr3	19509808	19539848
chr2	106782274	108181759
chr5	106711839	106905597
chr5	109980896	110672899
chr18	5630909	6494159
chr18	3770625	5109132
chr2	29388289	29908404
chr2	30769604	31079258
chr2	33716818	33986134
chr2	34115201	36270829
chr2	39885444	41204664
chr2	41241450	41793866
chr2	44556926	44755681
chr2	48863595	51470690
chr18	1570672	2413181
chr18	2422423	2454282
chr10	28718854	29344511
chr10	36705387	36784381
chr10	35949991	36074126
chr10	35645492	35814397
chr18	24595792	24708977
chr18	26866507	26969935
chr18	27017261	27833810
chr18	28277199	31543247
chr18	32561501	33212036
chr18	33274670	33542795
chr18	33753463	34129059
chr18	34401952	34520342
chr18	37569711	38304244
chr18	40414012	41939250
chr18	42130681	43124872
chr5	111201042	111435355
chr5	111772198	112083375
chr5	140786069	140933131
chr5	144208865	146089198
chr5	146797676	147370208
chr5	147587393	148245211
chr5	113581786	115071772
chr5	116601579	118940091
chr5	119532155	121941741
chr5	122537006	122700208
chr5	123663357	124072333
chr5	125611066	126316180
chr5	129241746	131003195
chr5	148481124	148702776
chr18	10550766	11154038
chr18	11281060	11518917
chr18	57159100	57369808
chr18	60039479	60507492
chr18	54514210	54661890
chr18	51257268	54074582
chr18	50428822	50567682
chr18	44317718	44481254
chr18	43776989	44080740
chr18	78440061	78582696
chr18	75595403	76146864
chr11	59852349	60728106
chr11	59218291	59504522
chr11	58748423	58762071
chr11	58343344	58370501
chr9	79632302	80164231
chr9	78591034	79494479
chr9	75231618	76295218
chr9	70683785	71203240
chr9	69772156	69968223
chr9	1018178	1969711
chr10	51792883	52739776
chr10	50811139	50967461
chr10	89800359	90863602
chr10	93965767	94287024
chr10	98511547	99355075
chr10	104394000	109838646
chr10	111338203	111988422
chr10	116556944	116670084
chr10	118354932	118533188
chrX	37693854	37827220
chrX	37909978	38073851
chrX	38347778	38766893
chrX	38878739	39394485
chrX	42324658	43556731
chrX	44287214	44402339
chrX	45930278	46295886
chrX	116137574	116241553
chrX	116949216	118309868
chrX	121006297	122662729
chrX	123016487	123076760
chrX	125182039	126547783
chrX	126566219	128909672
chrX	130422192	130637766
chrX	130765332	130825243
chrX	131024600	131634118
chrX	133802031	134063027
chrX	137046285	137321042
chrX	137864587	138529245
chrX	138841651	139630961
chrX	140543247	143109451
chrX	148149811	149144761
chrX	149975225	150282431
chrX	152137283	152575267

## Sheet: Type II NADs liftover to hg38
chr2	98069615	98380342
chr2	98662314	99021515
chr2	99966943	100436511
chr2	100517498	100812483
chr2	103134705	103177290
chr2	104841543	104853379
chr2	191148492	191509591
chr2	191099191	191111588
chr2	190645493	190661281
chr2	190560218	190585521
chr2	190445584	190536093
chr2	196284614	196319808
chr2	196920431	196967618
chr2	197001551	197017578
chr2	197095481	197264894
chr2	198285595	198313180
chr2	199749030	199752194
chr2	199850515	199869594
chr2	199909068	200032009
chr2	200043716	200724516
chr2	205608234	205848700
chr2	206248782	206283670
chr2	206438165	206478970
chr2	206688720	206884974
chr2	210395406	210483392
chr2	216579758	216726468
chr2	217704239	217711844
chr2	219747257	219757799
chr2	221400468	221600526
chr2	221629680	221635307
chr2	222009393	222026642
chr2	222982954	222994550
chr2	224030240	224044917
chr2	225650955	225679317
chr2	229711878	229713651
chr2	232038991	232269295
chr2	233747210	233756183
chr2	233792838	233936682
chr2	234587173	234805637
chr2	235208135	235418319
chr2	241799037	241864275
chr2	120409303	121084416
chr2	118980536	119069478
chr2	118880384	118929515
chr2	118607044	118870432
chr2	118567654	118580284
chr2	118219054	118504941
chr2	134515675	134547847
chr2	134660523	134708611
chr1	204634061	204941939
chr1	203934878	204046858
chr1	181410862	181433823
chr1	221141958	221222374
chr1	220362356	220553724
chr10	14436974	14806254
chr10	14296473	14325298
chr10	14244748	14262825
chr10	14119328	14177080
chr10	8125372	8130171
chr10	8038648	8086734
chr10	7398397	7593173
chr10	5970290	6037686
chr10	5883123	5928802
chr10	15427585	15440082
chr10	15467846	15483335
chr10	15717511	15745613
chr10	15848591	15864022
chr10	18646431	18663548
chr10	21385561	21400669
chr10	21904043	22012376
chr10	22213507	22299445
chr10	22578860	22740400
chr10	22981401	23002583
chr10	23091896	23106928
chr10	23150085	23165032
chr10	23192095	23205126
chr10	24097602	24394699
chr2	113164180	113379867
chr9	138073760	138122944
chr9	123246268	123720618
chr9	123756547	123768227
chr9	123823682	123881345
chr2	144564121	144620956
chr2	148530500	148559528
chr2	149026966	149047927
chr2	149541025	149599372
chr2	149985928	150003567
chr2	150778466	150808231
chr2	150878915	150885375
chr2	151060864	151238647
chr2	151485615	151720024
chr2	151760786	152101508
chr2	153474982	153509769
chr2	156564544	156593400
chr2	162048250	162055031
chr2	162121950	162127129
chr2	168125904	168181406
chr2	168203959	168252105
chr2	170244166	170335639
chr2	170362477	170388876
chr2	170679679	170717389
chr2	170775865	170863165
chr2	175997037	176005447
chr2	176026817	176054409
chr2	176760454	176771539
chr2	177106441	177124545
chr2	178092159	178198211
chr2	178444779	178500567
chr2	180976629	180993782
chr11	44363829	45717905
chr11	31794220	31828525
chr11	30315078	30361310
chr15	45454014	45471735
chr15	45517165	45530738
chr20	53445347	53491719
chr20	54256320	54282726
chr20	56089003	56104323
chr20	56168099	56262507
chr20	56621735	56708106
chr20	56761559	57462119
chr20	57468557	57528281
chr20	57558489	57597922
chr20	57615035	58084574
chr20	58647339	58667754
chr20	58812625	58915544
chr20	58977998	59045134
chr20	59730078	59767756
chr20	59934672	59955691
chr20	60023520	60063071
chr20	60096022	60151378
chr20	61516868	61836387
chr4	138657303	138690383
chr4	139780104	139987732
chr13	40375030	40560897
chr13	40161996	40198777
chr13	39842160	39963436
chr13	38752905	38851290
chr13	38683851	38716463
chr13	38347606	38379019
chr13	36667143	36754353
chr13	36513038	36560513
chr3	151133698	151189668
chr3	151203617	151205010
chr3	155077147	155114462
chr3	158094187	158121106
chr3	158846160	158847860
chr3	159249745	159275498
chr3	167717900	167738469
chr4	158142949	158260882
chr4	156944063	157008709
chr4	155370796	155406950
chr4	154608275	154638373
chr4	154534839	154564847
chr4	151412040	152360640
chr4	151010187	151026927
chr4	150947819	150950602
chr4	150362032	150370044
chr4	150045230	150313666
chr1	157163291	157968845
chr1	151941065	152054210
chr1	147725315	147871464
chr1	147494107	147677445
chr1	117603398	117694095
chr1	115817675	117032591
chr1	115004185	115243328
chr1	114977622	114982039
chr1	114886454	114888043
chr1	112283569	112307011
chr1	111799396	112070689
chr1	110601249	110635608
chr1	107053333	107062882
chr4	108588517	108685689
chr4	108499970	108531575
chr4	108306524	108372882
chr6	96514797	96523769
chr6	90841647	90874878
chr6	90746689	90767489
chr6	88529692	88546719
chr6	88462744	88504736
chr6	88361571	88387277
chr9	27396340	27583683
chr9	34786894	34828829
chr9	36739327	37007733
chr9	98372734	98684868
chr9	99328703	99426915
chr9	99802574	99831785
chr9	105674483	105902828
chr9	106696386	106732794
chr9	106745327	106796522
chr9	107511692	107751177
chr9	108065809	108088583
chr9	108537848	108542573
chr9	113832217	114051329
chr9	115071798	115089257
chr9	116148736	116154628
chr9	116726073	116741171
chr9	13805208	13816400
chr9	14475950	14490288
chr9	14561382	14587749
chr9	14675066	14696261
chr9	14765671	14779294
chr9	15109990	15135766
chr9	16091997	16100768
chr9	19921672	19935734
chr9	26870197	26893170
chr9	26932451	26980865
chr1	61723536	61776540
chr1	62135879	62268887
chr1	64456395	64562899
chr1	65413528	65437046
chr1	66750084	66766571
chr1	56831311	56841774
chr9	36002944	36003844
chr1	38773789	38789056
chr1	38516351	38658973
chr1	38444713	38466074
chr1	38239662	38392718
chr1	38085708	38220808
chr1	37234403	37391787
chr1	36564902	37176239
chr1	34682551	34693131
chr1	33942536	33973193
chr1	33527120	33602995
chr1	29590919	30690474
chr1	29514903	29560096
chr1	29423684	29462145
chr1	29269397	29411026
chr1	19969858	20431123
chr1	17697369	18690569
chr1	14891588	15098109
chr1	13281371	13372095
chr1	11328521	11554964
chr1	6783523	7628045
chr1	5643445	5910312
chr1	5281385	5371865
chr1	5119056	5161486
chr1	4560595	4778429
chr1	4277750	4345546
chr1	4111987	4214027
chr1	4018328	4028221
chr1	3909286	3999510
chr1	2607014	3554523
chr7	78109864	78124041
chr7	893744	896434
chr7	152816385	152932217
chr7	154780813	155013491
chr7	155531266	155781673
chr7	155797095	155823940
chr4	4916200	5018196
chr4	14994956	15018630
chr4	15145895	15162206
chr4	24655361	24664120
chr4	24792609	24816516
chr4	30712670	30728464
chr4	41594806	41713013
chr4	54354954	54374782
chr4	54623165	54692981
chr4	82247422	82249764
chr4	84477102	84505355
chr4	84522627	84527007
chr1	90688455	90733422
chrX	338726	346805
chr22	25741680	26293167
chr22	25482947	25729166
chr12	107931579	108349208
chr12	119614438	119622336
chr12	119517894	119552291
chr12	119444718	119471165
chr12	119336296	119365165
chr12	119074510	119221470
chr12	118432105	118442216
chr12	117826708	117904857
chr12	117358224	117413702
chr12	117235718	117335109
chr12	115719567	115758275
chr12	115401718	115692492
chr12	115243005	115309058
chr12	115126924	115147885
chr12	115012653	115033312
chr12	114798414	114840594
chr12	114311893	114745867
chr12	113518893	114045709
chr12	112752054	112887888
chr12	112658477	112711829
chr12	128640148	128678081
chr12	128697648	128928153
chr12	130115343	130186498
chr12	130316347	130396676
chr12	130468557	130485762
chr12	130562756	130620414
chr12	130644419	130936925
chr12	130982816	131163549
chr12	131284291	131410508
chr7	71710511	71790947
chr7	71602486	71651106
chr7	71507516	71524819
chr7	100014878	100131688
chr7	100148698	100174081
chr7	4235763	4303625
chr13	26340356	26384043
chr7	118175108	118186878
chr7	131720322	131769820
chr7	131894068	131995537
chr7	132022148	132068120
chr7	132094023	132103272
chr7	132124585	132596152
chr7	132756025	132772229
chr7	133088060	133155631
chr7	133236064	134193810
chr7	137578898	137850628
chr7	141061391	141074662
chr7	141259397	141294840
chr7	141456030	141487957
chr7	150448679	150467303
chr7	150791226	150824636
chr7	24540557	24555591
chr7	25182576	25578900
chr7	27230155	27264845
chr7	27367365	27536869
chr7	28037496	28046770
chr7	28675365	28690643
chr7	28919076	28941967
chr7	29864425	29917651
chr4	120064730	120072743
chr2	88259684	88454009
chr2	88159945	88200645
chr2	86835903	88098562
chr2	75499360	75544544
chr2	75454096	75483482
chr3	126539156	126543445
chr3	13150231	13344024
chr3	64530627	64711875
chr3	64976224	64997495
chr3	65081466	65144363
chr3	65290914	65684342
chr3	66959217	67005274
chr3	67534509	67664570
chr3	68859149	68891122
chr3	71294246	71808982
chr3	73219255	73244904
chr3	10462954	11262815
chr10	42970983	43063163
chr12	1882105	2637881
chr12	5056236	5114733
chr12	24012940	24135578
chr12	24222276	24285695
chr12	24548344	24578507
chr12	24597587	24642405
chr12	29367658	29387691
chr19	54371854	54468367
chr19	54468458	54477215
chr19	55044630	55067923
chr19	56087320	56185495
chr19	56246698	56285032
chr1	248294658	248295494
chr19	56834547	56906295
chr19	57052061	57104204
chr19	57987852	58002921
chr19	48115369	48196957
chr19	42524036	42529751
chr19	33467774	33973794
chr19	32328433	32337237
chr19	32215863	32226847
chr19	31255167	31392459
chr19	30621637	30709253
chr19	30511464	30519940
chr19	30375518	30483551
chr19	30221600	30230171
chr19	30051034	30082135
chr19	29723886	29730846
chr19	29605795	29694993
chr19	51081956	51090128
chr19	50975427	51069566
chr19	50824579	50912893
chr11	17449426	17952292
chr11	20636154	20675631
chr15	25356752	25447055
chr15	23641046	23651486
chr15	23561414	23578083
chr15	31503044	31525490
chr15	28909657	28961411
chr15	29086968	29126571
chr15	29250931	29278706
chr15	101322812	101725667
chr15	99950926	100527018
chr15	97959003	97980882
chr15	97899041	97912326
chr15	92671448	92695888
chr15	92614152	92627414
chr15	91257661	91306928
chr15	85859455	85863904
chr15	88239071	88242965
chr11	79464503	79516013
chr11	79376096	79453090
chr11	79226092	79300919
chr11	78867350	79157623
chr11	78572205	78659631
chr11	78532072	78564931
chr11	78401771	78424815
chr11	7986985	8039887
chr11	8058876	8102762
chr11	8175899	8389024
chr11	13882041	13976187
chr16	21156525	21189872
chr16	24023669	24058074
chr16	27096845	27111231
chr10	123102435	123204920
chr10	123782107	123821894
chr10	123963063	124025242
chr10	124084736	124357754
chr10	125234186	125249412
chr10	125494938	125520896
chr10	126037684	126055990
chr10	126141913	126178280
chr10	126379758	126434941
chr10	126865930	127046228
chr10	127088679	127106553
chr10	127159107	127207945
chr10	127387496	127489129
chr10	127621275	127623361
chr10	127684168	127746173
chr10	127797998	127813433
chr10	129373442	129417541
chr10	130209766	130213244
chr10	130340117	130369598
chr10	131709385	131746021
chr10	132812145	132943916
chr10	133039629	133141801
chr11	1100744	1608679
chr11	1621171	2161558
chr11	2163447	2275538
chr11	2451880	2597615
chr11	2655109	2876293
chr13	106182118	106190587
chr13	106614607	106631951
chr13	106904824	106928723
chr13	107202634	107213928
chr13	108202565	108229935
chr13	108268510	108343104
chr13	108844016	110028991
chr13	113896605	114015296
chr8	2238353	2255386
chr13	51932923	51971229
chr8	40860413	41441993
chr8	39913064	40213994
chr8	36867515	36882570
chr8	36972506	37015201
chr8	37147687	37194986
chr8	37373955	37680661
chr8	31184241	31267626
chr8	31029065	31034532
chr8	30958058	30978177
chr8	30900790	30939670
chr8	29426379	30532415
chr8	9502817	9533535
chr8	9047284	9493072
chr8	12944125	13000983
chr8	17368667	17409884
chr8	17496352	17802551
chr4	189894911	189903310
chr4	186555066	186744867
chr4	186131773	186192610
chr4	186038155	186071421
chr4	185363252	185440774
chr4	184137686	184380883
chr4	183820222	183866727
chr4	183738198	183748559
chr4	168641880	169260690
chr8	19288504	19321027
chr8	19406213	19421394
chr8	19751169	19898699
chr8	19928974	19952141
chr8	20086244	20122148
chr8	20188588	20320465
chr19	17177730	17178311
chr19	15760132	15774844
chr22	34362177	34375606
chr22	35443888	35557074
chr4	148440917	148449018
chr4	147546673	147611576
chr4	147481165	147497304
chr4	147085486	147111233
chr4	146898473	146924270
chr4	146629664	146645469
chr4	146511367	146524188
chr4	146410374	146495450
chr4	146335369	146358679
chr4	146233038	146289651
chr4	146170554	146202691
chr4	145040740	145060998
chr4	143578007	143611481
chr4	143148012	143157808
chr4	141210416	141241480
chr4	140813799	140871725
chr4	140632846	140791541
chr4	140498689	140535598
chr4	140343636	140398247
chr16	47081266	47148815
chr16	47452626	47496396
chr16	47626596	47650648
chr16	47705268	47727961
chr16	47779578	47828788
chr16	47879471	48043600
chr16	48075216	48274149
chr16	48680432	48717111
chr16	48810769	49022615
chr16	49259376	49283028
chr16	49338295	49980746
chr16	50899808	51183672
chr16	54135205	54799892
chr16	54847298	55266990
chr16	55290397	55539466
chr16	55579819	55815355
chr16	66143044	66173071
chr16	66222381	66380575
chr16	66399138	66435461
chr16	66471258	66553538
chr16	74177523	74263039
chr16	74025136	74079488
chr16	73140889	73197016
chr16	73079702	73098983
chr16	72718175	72809594
chr16	72178453	72206414
chr16	72117898	72140645
chr16	71252645	71594625
chr16	71143515	71179175
chr16	70937042	71010892
chr16	70817416	70880902
chr16	77212375	77238970
chr16	77571295	77586701
chr16	78498867	78536904
chr16	78987436	79016386
chr16	79567671	79626086
chr16	79634674	79662087
chr16	80457196	80469627
chr16	80676010	80684705
chr16	80801312	80812928
chr16	80931517	80941203
chr16	81670079	81946638
chr1	233135006	233791975
chr1	233917319	233978777
chr1	234083471	234297058
chr11	102659781	102681577
chr11	100922786	100956626
chr11	95665544	95707414
chr11	95565126	95572331
chr11	94993408	95478526
chr11	94297099	94410813
chr11	94110055	94215942
chr11	94007667	94044729
chr11	93821537	93845612
chr7	33412086	33456451
chr7	33550052	33559689
chr7	33695385	33744736
chr7	34810188	34833897
chr7	35518456	35546748
chr7	36145079	36184326
chr7	36239983	36299637
chr11	134377515	134417832
chr11	133810543	133845586
chr11	133526420	133544806
chr11	133060283	133089846
chr11	131666202	131690008
chr11	130712382	130928756
chr11	130445866	130576793
chr9	33747918	33760031
chr11	129691356	129751717
chr11	129614065	129624365
chr11	129361971	129461183
chr11	128665904	129055862
chr11	128285341	128297657
chr11	127071201	127111232
chr11	126969252	127040987
chr11	126916639	126930821
chr11	126774144	126882101
chr11	126694733	126726348
chr11	126637297	126655047
chr11	126059681	126162901
chr11	125886263	125983892
chr11	122222278	123023054
chr11	120511164	121587226
chr11	119757636	120112636
chr11	117370941	118309026
chr11	116502109	116719520
chr11	116197299	116215688
chr11	115617549	115642431
chr11	115063452	115178723
chr11	113896412	114990419
chr11	113534748	113716001
chr11	113322377	113477026
chr11	112292616	112911642
chr11	111287948	111308581
chr11	110364001	110461165
chr11	108952580	108977467
chr11	107924399	107933119
chr11	107743561	107775863
chr15	51381899	51406660
chr15	76341194	76372200
chr15	70931621	71749231
chr15	70226072	70471228
chr15	69538958	70017571
chr15	66015051	66230628
chr15	61801594	61909055
chr15	61151714	61246425
chr15	61015004	61139771
chr15	60879070	60994305
chr15	60535635	60821087
chr15	60258636	60291298
chr15	60155141	60231929
chr15	59989632	60015512
chr15	59720650	59741295
chr15	58060720	58571674
chr15	57742889	57970940
chr15	55100460	55106172
chr15	52797748	52806382
chr6	53989890	53990844
chr6	75202632	75306219
chr6	83857365	83885589
chr3	138983329	138986951
chr3	137760990	137773243
chr3	134792465	134810382
chr3	134640969	134669888
chr3	130728124	130771065
chr3	130648607	130681171
chr3	50778348	50841790
chr3	36696448	36715732
chr3	33919164	33921580
chr3	31516741	31986484
chr3	30756458	30778482
chr3	28220192	28246027
chr3	27802792	27810099
chr3	37421635	37485609
chr3	37520136	37550370
chr3	37726275	37813036
chr3	38337640	38872310
chr3	38896953	38990355
chr3	39011747	39013437
chr3	39501936	39758992
chr3	39897996	40213589
chr3	40990454	42504854
chr3	43727937	44287062
chr3	44331867	44727647
chr3	45502845	45602593
chr6	150346403	150361776
chr6	151695422	151708024
chr6	151720479	151726007
chr6	138399758	138459490
chr6	137197292	137232218
chr6	136727232	136938116
chr6	134097004	134113952
chr6	134022147	134044101
chr6	133951054	134002285
chr6	132723651	132725433
chr6	109969490	110075854
chr6	109673489	109824014
chr6	107392443	107642574
chr6	107308181	107361652
chr6	106680464	106928012
chr6	105981468	105996051
chr6	105077728	105108566
chr6	101391820	101402542
chr2	108875865	109064158
chr10	70948632	71669111
chr10	69639881	69939434
chr10	62492568	62994254
chr10	61738880	61762322
chr10	61262878	61294723
chr10	61067167	61155000
chr10	61027238	61045417
chr10	60875616	60993106
chr10	58456296	59181206
chr21	44637778	44682367
chr21	44399098	44612939
chr19	15003278	15053966
chr12	105292978	106052990
chr12	106603911	106749289
chr12	106907719	106920151
chr12	106951716	107126991
chr12	107314743	107362410
chr12	107609805	107680483
chr12	103619356	103685796
chr12	102925410	102967056
chr12	101651350	101660082
chr12	101395802	101441151
chr12	98991811	99032947
chr12	95629445	95770927
chr12	94788739	94965511
chr12	94375162	94530466
chr12	93520509	94329152
chr12	92539997	92579831
chr12	92020827	92161871
chr12	70708369	70740848
chr12	70638232	70653898
chr12	70426756	70594480
chr12	69064656	69071416
chr12	67415240	67685435
chr12	67253855	67302709
chr12	59060503	59093523
chr22	31574084	31626130
chr22	31471012	31491365
chr7	45007477	45279663
chr7	45483645	45511620
chr7	45562741	45981636
chr7	46170275	46219168
chr7	47683254	47855280
chr7	47876150	47982475
chr7	48085286	48098301
chr7	50983569	51017669
chr2	67396932	67405408
chr2	66380922	66419129
chr2	65601959	65664422
chr2	64050085	64314600
chr1	28095266	28096010
chr2	63576414	63593952
chr2	63038415	63069330
chr2	62694972	62775710
chr2	62503009	62593740
chr2	62486082	62497531
chr2	60545050	60588444
chr2	60480375	60511849
chr2	60243210	60377486
chr2	54721615	54726412
chr2	54429953	54705672
chr2	54069248	54118318
chr5	173309721	173358015
chr5	173536033	174148852
chr5	170605751	170642343
chr5	169258209	169308622
chr5	168592364	169181293
chr5	168205882	168221760
chr5	160174767	160468841
chr5	159952809	159964580
chr5	159906391	159921344
chr5	159817727	159861842
chr5	159509418	159518860
chr5	159432142	159464055
chr5	158086759	158116038
chr5	157130426	157150814
chr5	181188394	181255008
chr5	180747979	180869289
chr5	180668372	180670290
chr5	178992179	179443475
chr5	178309743	178631207
chr5	133151009	133895872
chr5	151858344	151864026
chr5	152497658	152568924
chr5	153186948	153234773
chr5	153271192	153279594
chr5	153747792	153798849
chr5	153918830	154166635
chr1	248739229	248751277
chr1	247840892	247877053
chr17	15118554	15177614
chr17	14102473	14368777
chr17	12180220	12193741
chr17	11990449	11992323
chr17	11235368	11248218
chr17	10599565	10774267
chr17	10309288	10379920
chr17	9874183	9925971
chr17	9629235	9839832
chr17	5514649	5555792
chr17	6293662	6310767
chr17	6336062	6413663
chr17	3524103	3583958
chr17	2851335	3091357
chr17	29866978	30076285
chr17	29679096	29831120
chr17	32862604	33028546
chr17	33741889	33756282
chr17	34167643	34190556
chr17	34382560	34467090
chr17	34556173	34640506
chr17	34715465	34738291
chr17	34793758	34910316
chr17	35137210	35183427
chr17	36638442	36916501
chr17	60746861	61073823
chr17	61149430	61716579
chr17	61745677	61747231
chr17	58123406	58964879
chr17	56690173	56806363
chr17	56569954	56603319
chr17	55716475	55787369
chr17	55511744	55532487
chr17	54889744	54972169
chr17	48187542	48762725
chr17	40694570	40708128
chr17	40747129	40754269
chr17	40791684	40845314
chr17	40906419	40915564
chr17	41493214	41569223
chr17	41610653	41628415
chr17	46738973	47011231
chr17	47316346	47317802
chr17	62415813	62421759
chr17	66899255	67688724
chr17	65528469	65602416
chr17	68779303	68780373
chr17	72090458	72102138
chr17	72883327	73650123
chr17	73844122	73868390
chr17	74010020	74125095
chr17	74142246	74182833
chr17	79178463	79636860
chr2	24682709	25197082
chr2	24422609	24679440
chr2	23753249	23799343
chr2	23305329	23716373
chr2	19339165	19372423
chr2	16588248	16622419
chr2	16028549	16128416
chr2	15140025	15171659
chr2	8171152	8365060
chr2	7029077	7130048
chr2	3118836	3214408
chr2	2901153	2954558
chr2	644565	677479
chr7	106854213	106870145
chr7	106730805	106746740
chr7	18071986	18097510
chr7	13974980	13999129
chr7	12709808	12726787
chr7	111558191	111565674
chr7	111493224	111508096
chr14	31567543	31575915
chr14	31597545	31922372
chr14	32904311	32942091
chr14	33705556	33706103
chr14	33716459	34091418
chr14	34215247	34276447
chr14	36634808	36677484
chr14	37583075	37599318
chr14	50940978	51189287
chr14	58507666	59092542
chr14	59499280	59533703
chr14	59919772	60108334
chr14	60108606	60134793
chr14	60143713	60488330
chr14	61308566	61447371
chr14	62112114	62181274
chr14	63871013	64303688
chr14	65785957	65843921
chr14	65944916	65959885
chr14	69866199	70192609
chr14	70325801	70363729
chr14	70372775	71116893
chr14	77323600	77423601
chr14	77801382	77945092
chr14	87985086	87997070
chr14	88083365	88096567
chr14	88204767	88220132
chr14	88318501	88393751
chr14	88831661	89728984
chr14	89759306	89878811
chr14	89908963	90091788
chr14	90183594	90192010
chr14	90892320	91285160
chr14	92164339	92172131
chr14	92350471	92409008
chr14	92456347	92991487
chr14	93343326	93344219
chr14	93713366	93789410
chr14	93816750	94005010
chr14	94442871	94561096
chr14	95570423	95660878
chr14	95788619	95850764
chr14	95890396	96096112
chr14	96661690	97113203
chr14	97432309	97441953
chr14	98830090	99335143
chr14	99984045	100160462
chr14	100604053	100623297
chr14	104005619	104400408
chr14	104431515	104564909
chr14	105602930	105607253
chr7	22088700	22122328
chr6	24225255	24240520
chr6	21456734	21530303
chr6	21131131	21408829
chr6	20067672	20070201
chr6	4161785	4165630
chr6	5512287	5514034
chr6	5679268	5856467
chr6	5989219	6010394
chr6	8420854	8437221
chr6	8499839	8527381
chr6	10821580	11038132
chr6	12378539	12414275
chr6	12568354	12639477
chr6	12833147	12847248
chr6	14034878	14270314
chr6	14610154	14731114
chr6	14759104	14832033
chr6	14880035	15037019
chr6	15734918	16098151
chr6	16928039	17086682
chr6	17095258	17317909
chr5	174404294	174527038
chr5	175244322	175317055
chr5	135493401	135843112
chr5	136748779	136781417
chr5	137608989	137662774
chr9	84391550	84424308
chr9	87387673	87712670
chr5	4849082	4896500
chr5	3583924	3619219
chr5	2737555	2760663
chr5	1871647	1890527
chr5	71931631	71962174
chr5	71814250	71882003
chr5	56318308	56325578
chr3	59478960	59485051
chr3	59505645	59517669
chr3	59530143	59544281
chr3	59556553	59583597
chr3	59797578	59866441
chr3	61534028	62279049
chr3	62312962	62336664
chr3	62361966	62378830
chr9	72354457	72360711
chr3	24673654	24704944
chr3	24483039	24523165
chr3	23745071	23771862
chr3	23724108	23733216
chr18	616497	644225
chr10	75360474	75961593
chr10	75993054	76175529
chr10	76282637	76336559
chr10	76432755	76437765
chr10	76888311	77976978
chr3	55822097	55868951
chr3	55719083	55781587
chr3	55602917	55659124
chr3	55423697	55584408
chr3	53691401	54056344
chr3	53484516	53606828
chr3	53400115	53431275
chr10	49383819	49623218
chr10	49295846	49324406
chr10	48893871	49013800
chr10	48186092	48323977
chr10	47039752	47052679
chr10	47252436	47384348
chr10	86160627	86377429
chr10	84540415	84546577
chr14	53332496	53354201
chr14	53527928	53608161
chr14	53860950	53885366
chr14	53941629	53966786
chr14	54165882	54185342
chr14	55961423	56928868
chr14	56997820	57182155
chr14	57455406	57501068
chr14	20699549	20772028
chr14	23638632	23669869
chr13	24626415	24700863
chr13	21638628	21645233
chr13	49567509	49587268
chr13	26000196	26073792
chr13	25910699	25931719
chr13	23615317	23669274
chr13	23320593	23588070
chr13	50157516	50278592
chr13	50319444	50359399
chr13	50783948	50853816
chr8	10929047	11215722
chr8	9918570	10446212
chr8	27171730	27187071
chr8	27026798	27080276
chr8	26700252	26799632
chr8	25920666	26035331
chr8	25630959	25850400
chr8	20349072	20394550
chr2	110022364	110050408
chr13	45605595	46184612
chr13	43570018	43682320
chr13	42741544	43569300
chr13	42623367	42737127
chr13	99778440	100100439
chr13	100510957	100599951
chr13	100665656	100682469
chr5	41903200	41948138
chr5	41842651	41875500
chr5	38418093	38746414
chr5	17316614	17402670
chr5	11046692	11115986
chr5	10992625	11001961
chr8	98192380	98204859
chr8	98318101	98369668
chr8	98370271	98440348
chr8	98456745	98474915
chr8	98856873	99094702
chr8	99788562	99905658
chr8	99926253	100396383
chr8	101360858	101543155
chr8	101604134	101654690
chr8	102196225	102196480
chr8	103743543	103761449
chr8	103795620	103807373
chr8	104320630	104606405
chr8	107484968	107497649
chr8	109322295	109347360
chr8	117033422	117046744
chr8	117514924	117521714
chr8	119989710	120142359
chr8	120425509	120520130
chr8	121703722	121714032
chr8	124052846	124238777
chr8	129581475	129627917
chr8	129677039	129697608
chr8	134658499	134707643
chr8	140034661	140109637
chr8	140156294	140266175
chr8	140355833	140396718
chr8	141392283	142027310
chr8	142111195	142540068
chr22	36589589	36938503
chr22	42149814	42155623
chr22	43227365	43667253
chr22	43701186	43747774
chr22	43770176	44984355
chr22	48485937	48658141
chr22	48696371	48719499
chr22	49571882	49646790
chr12	38304800	38319563
chr12	38902116	38915354
chr12	42506180	42695262
chr12	43832008	43896983
chr12	45127059	45131877
chr12	45408641	45501466
chr12	45664041	45726892
chr12	46211911	46463165
chr12	46650012	46682045
chr12	46869415	46896271
chr12	46964372	47044892
chr12	47066592	47100426
chr12	47181683	47216414
chr12	47537376	47617060
chr12	48337902	48352573
chr12	48453573	48497148
chr12	51428416	51922960
chr12	52292742	52424045
chr12	52519017	52695732
chr12	52708978	52857702
chr12	53937530	54140618
chr16	7207592	7246188
chr16	9165355	9221569
chr16	9247808	9333871
chr16	9363299	9404125
chr16	10241964	10257575
chr16	10528851	10668775
chr16	12217802	12854701
chr16	12868460	12908062
chr16	15433554	15463019
chr16	15515258	15789793
chr8	48008111	48031672
chr12	32878837	32901629
chr12	32746262	32756958
chr12	32676811	32681052
chr12	32491112	32536095
chr3	183627614	183628763
chr3	184510355	184525930
chr3	184848403	184900985
chr3	185024224	185176962
chr3	185204410	185251926
chr3	185979741	186679624
chr3	186716855	187371604
chr3	187398200	187450279
chr3	187663830	187708735
chr3	192901574	192928189
chr3	193013306	193028780
chr3	123345513	124528245
chr3	121730607	121854945
chr3	120122340	120167855
chr3	119094071	119100662
chr3	114124615	114234618
chr3	112961747	113605501
chr3	112108947	112119083
chr3	111063347	111085639
chr21	31891777	32065961
chr21	32128579	32215335
chr21	32910545	33053594
chr21	35638458	35942732
chr21	36574759	36897939
chr21	37607399	39094961
chr21	39454738	39518587
chr21	40473400	40499762
chr21	40835438	40856276
chr21	41017173	41127128
chr6	157403738	157587597
chr6	158977144	159261441
chr6	165208003	165875249
chr6	163612743	163629883
chr6	163130296	163373706
chr6	161386429	161442122
chr6	160122462	160477793
chr6	169449306	170289867
chr5	98886643	98932124
chr5	98766672	98804835
chr5	96878222	97195411
chr19	52189647	52226654
chr6	38714992	38717892
chr6	38871676	38896149
chr21	42216721	42786028
chr19	15582888	15629122
chr6	29926340	29934473
chr6	31353751	31357808
chr6	48069073	48079325
chr6	47301910	47462463
chr6	47245235	47275880
chr6	47048231	47105788
chr6	46596638	46899961
chr6	46527200	46529206
chr6	46410315	46511039
chr6	46314974	46366078
chr6	45879636	46200893
chr6	45787977	45861475
chr6	44841583	44942184
chr6	44503817	44806055
chr6	40984932	41162975
chr6	40884234	40909656
chr6	40520494	40550870
chr6	40456835	40507569
chr6	40284791	40340823
chr6	40187594	40251030
chr6	39786280	40041816
chr6	39606117	39774520
chr6	39470434	39578193
chr6	39333963	39465425
chr6	39298721	39318853
chr5	107968525	107981922
chr18	8455497	8519769
chr18	8347426	8408012
chr18	8288149	8330902
chr18	7802132	7853723
chr18	7734049	7790938
chr18	7548125	7636149
chr18	7365855	7448857
chr18	7111304	7144806
chr2	29221548	29252210
chr2	29279820	29302822
chr2	30748400	30757287
chr2	31129712	31171526
chr2	44474879	44492871
chr2	44903356	45014207
chr2	45128117	45420092
chr2	45676451	46388317
chr10	28661781	28695921
chr10	28876034	28893931
chr10	29225693	29277178
chr10	27485509	27566391
chr10	27735839	27750277
chr10	28179698	28211052
chr10	28278136	28309107
chr10	36640592	36683661
chr10	36179579	36189007
chr10	35639318	35647607
chr18	22056936	22083859
chr18	22160753	22230843
chr18	23046150	23377787
chr18	24592809	24608555
chr18	24720939	24745611
chr18	24786535	24956883
chr18	24959579	25140294
chr18	25862762	25914108
chr18	26396856	26408962
chr18	26417013	26687929
chr18	26858724	26864454
chr18	31041175	31044369
chr18	31545325	31554561
chr18	32769494	32773590
chr18	34157657	34171449
chr18	34219811	34228985
chr18	34576004	34589303
chr18	34638040	34672277
chr18	34691453	34744833
chr18	34751412	34772903
chr18	34784369	34795667
chr18	34887827	34890648
chr18	34953689	34956624
chr18	35810503	36175911
chr18	36178937	36446182
chr18	36454372	36487356
chr18	36511208	36695034
chr18	36703979	36708744
chr18	36728562	36731142
chr18	36740381	36782593
chr18	36826787	36831784
chr18	37236799	37508572
chr18	37516582	37549642
chr18	37555099	37578863
chr18	37778247	37780547
chr18	42026979	42058917
chr18	43272294	43279454
chr5	111158806	111244542
chr5	111435384	111518792
chr5	111730152	111760268
chr5	112087126	112686562
chr5	139832162	140031876
chr5	140960970	141018767
chr5	141301531	141329563
chr5	142187131	143046792
chr5	144152681	144206521
chr5	145884090	145908144
chr5	146337729	146367642
chr5	146445083	146563482
chr5	146650247	146683288
chr5	147370039	147397298
chr5	147444832	147464137
chr5	115088350	115429794
chr5	116156106	116275069
chr5	116358304	116375988
chr5	116514987	116587888
chr5	122486815	122521928
chr5	123085030	123100586
chr5	124187809	124251575
chr5	124395990	124463823
chr5	124512470	124584799
chr5	124942785	125014129
chr5	125408756	125414389
chr5	127514525	127589916
chr5	127708454	127761590
chr5	127863470	127886387
chr5	129091153	129100111
chr5	148805221	148840406
chr5	148713200	148751397
chr5	148382606	148434432
chr18	10202646	10547653
chr18	57049722	57083051
chr18	57426562	57448676
chr18	58544922	58619139
chr18	59155846	59161971
chr18	59218307	59236347
chr18	11652033	11674314
chr18	11689132	11693374
chr18	56563158	56577588
chr18	56080305	56107327
chr18	50574484	50659673
chr18	50282285	50426969
chr18	50242842	50281934
chr18	50165085	50204230
chr18	49860822	50092744
chr18	47730428	47758201
chr18	46601113	46725280
chr18	46320088	46434369
chr18	44673901	44697608
chr18	78788621	78841730
chr18	78585224	78703449
chr18	78073561	78439661
chr18	77837161	77932618
chr18	77649639	77786449
chr18	76137460	76146864
chr11	66715114	67025449
chr11	64404192	64665966
chr11	63467463	63620126
chr11	63007629	63025529
chr11	59794960	59810913
chr11	59752992	59764698
chr11	59157991	59217586
chr11	58569088	58639237
chr9	79542756	79624990
chr9	69968012	70007721
chr9	69462604	69768834
chr9	68701148	68783303
chr9	68552003	68647850
chr9	248731	810822
chr9	840879	929968
chr9	965343	1004947
chr9	3008874	3035183
chr10	52729189	52739776
chr10	52304895	52326424
chr10	51659348	51734951
chr10	51068882	51083302
chr10	50984390	51002535
chr10	88066079	88139017
chr10	88384297	88408640
chr10	92739494	92993419
chr10	93061893	93247792
chr10	93643701	93770719
chr10	93812008	93900833
chr10	93912735	93942109
chr10	95237338	95264869
chr10	95516157	95937132
chr10	96031762	96074869
chr10	96221495	96730113
chr10	97820999	97945300
chr10	97973250	98188834
chr10	98455599	98478777
chr10	99356682	99367389
chr10	100574375	100869067
chr10	101088279	101539442
chr10	104363214	104365671
chr10	104389753	104401108
chr10	109838616	109868301
chr10	111020482	111178282
chr10	111219675	111244591
chr10	112114462	112287746
chr10	114972038	115575648
chr10	115646085	115676940
chr10	115726921	115830130
chr10	115853317	116224130
chr10	116431960	116491241
chr10	116660479	116785867
chr10	116788015	116915770
chr10	117092154	117245834
chr10	117549189	117577662
chr10	117647545	117704751
chr10	117800390	117839416
chr10	118234513	118260518
chr10	102809894	102816310
chrX	37827583	37848086
chrX	38767365	38874432
chrX	39333751	39449951
chrX	40284083	40441082
chrX	44489508	44544778
chrX	45183968	45190981
chrX	115988253	116015681
chrX	130722081	130753223
chrX	133017991	133056127
chrX	133137842	133802073
chrX	137645724	137656963
chrX	140501186	140519512

## Sheet: README
Supplemental Table S5
Liftover of MEF NADs to hg38.
Crosslinked MEF NADs (Supplemental Table S3, Sheet 3), or Type I (Supplemental Table S3, Sheet 5) or Type II (Supplemental Table S3, Sheet 7) were lifted over to hg38.
